# Supplementary material for: MicroRNAs Are Involved in the Regulation of Ovary Development in the Pathogenic Blood Fluke Schistosoma japonicum
Source: PubMed Central journal article supplement (PMC4752461; doi:10.1371/journal.ppat.1005423), 2016-02-12

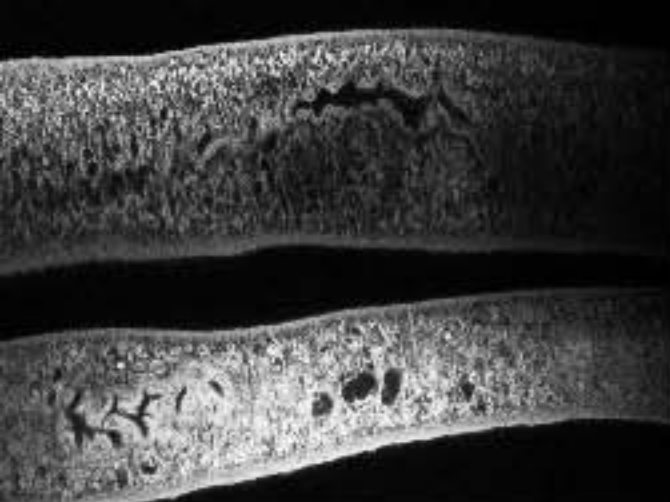

6 -17.50  $\mu\text{m}$

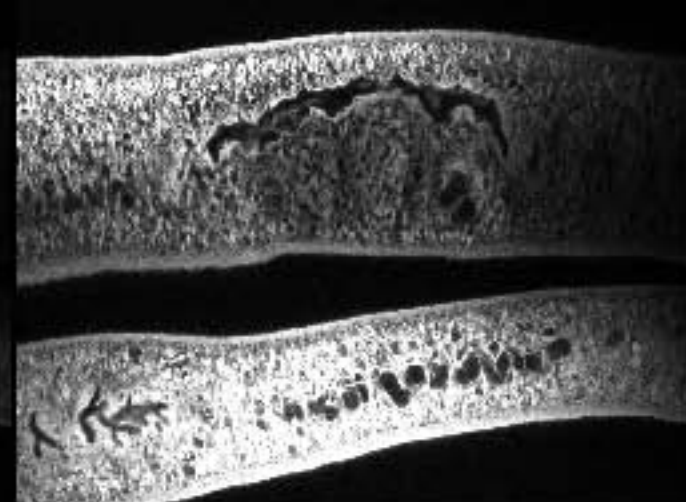

7 -21.00  $\mu\text{m}$

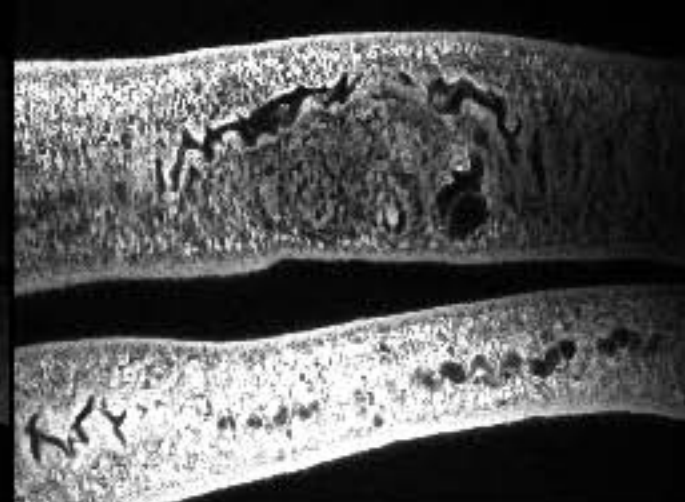

8 -24.50  $\mu\text{m}$

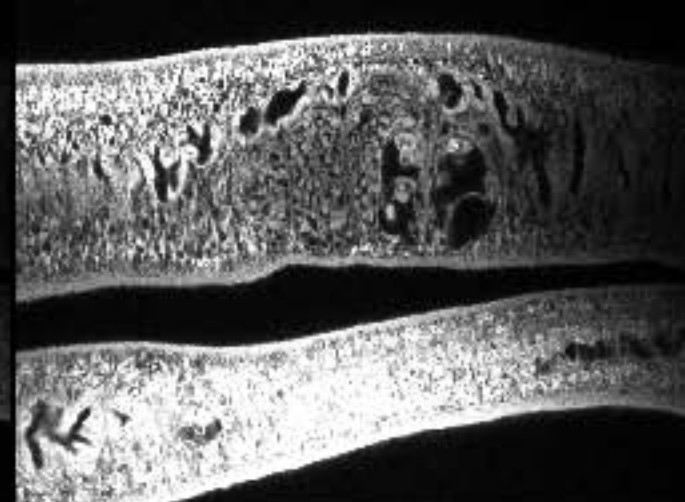

9 -28.00  $\mu\text{m}$

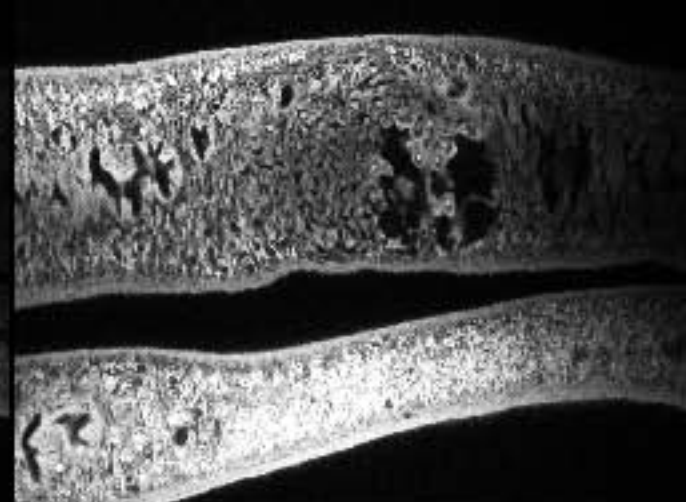

10 -31.50  $\mu\text{m}$

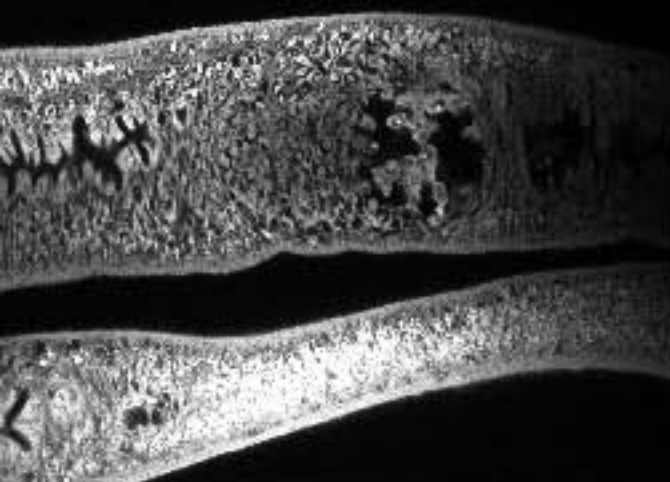

11 -35.00  $\mu\text{m}$

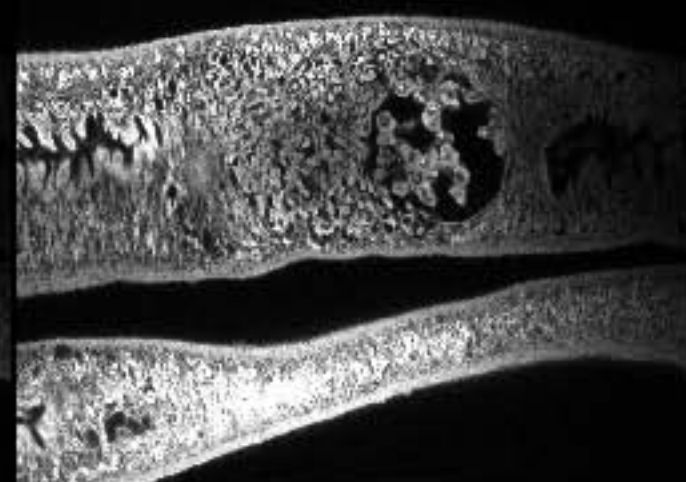

12 -38.50  $\mu\text{m}$

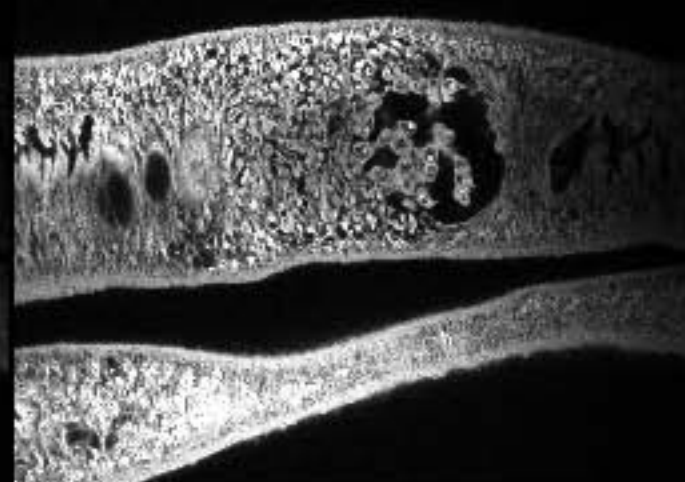

13 -42.00  $\mu\text{m}$

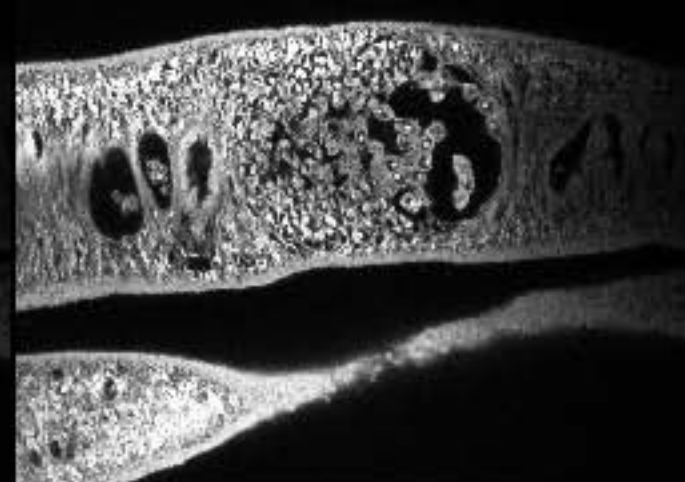

14 -45.50  $\mu\text{m}$

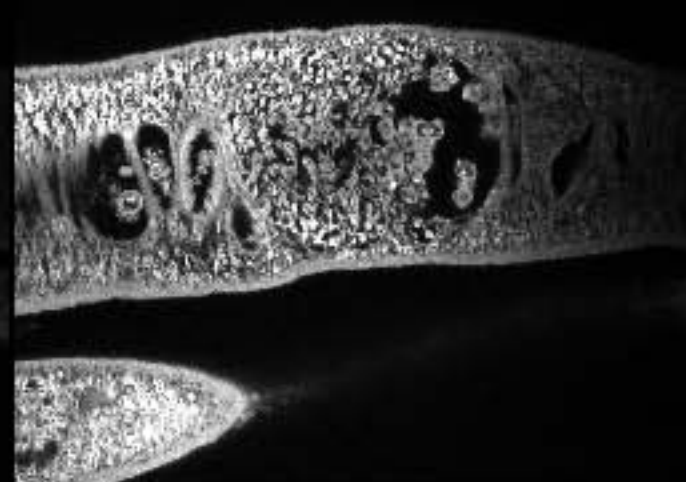

15 -49.00  $\mu\text{m}$

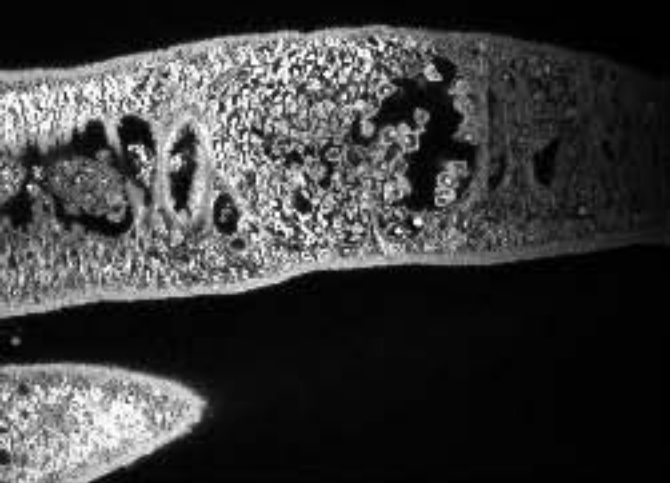

16 -52.50  $\mu\text{m}$

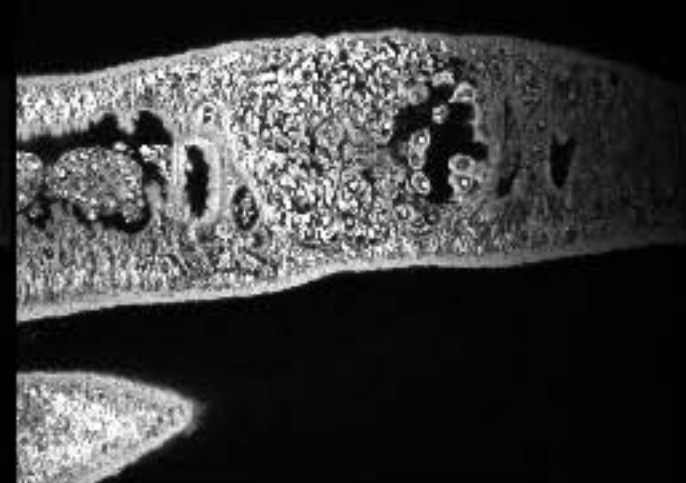

17 -56.00  $\mu\text{m}$

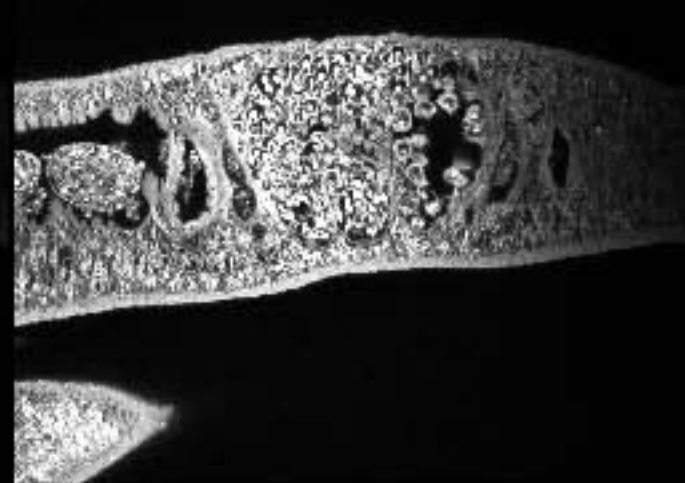

18 -59.50  $\mu\text{m}$

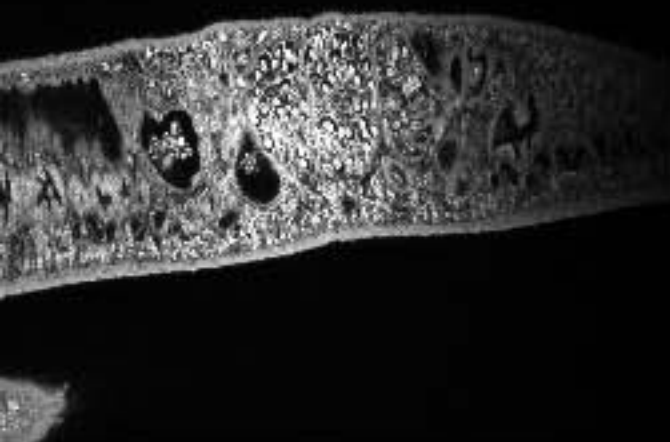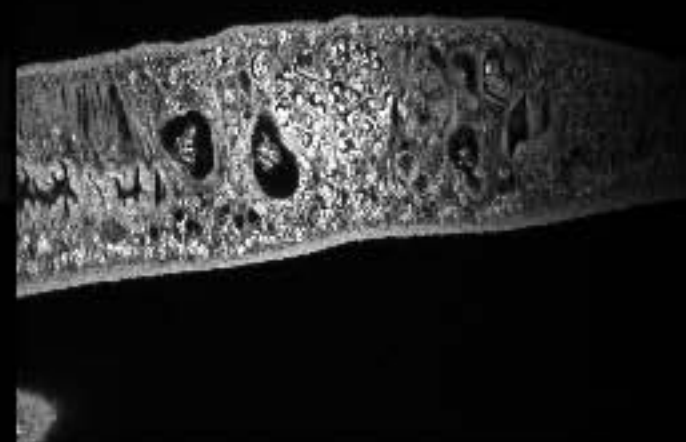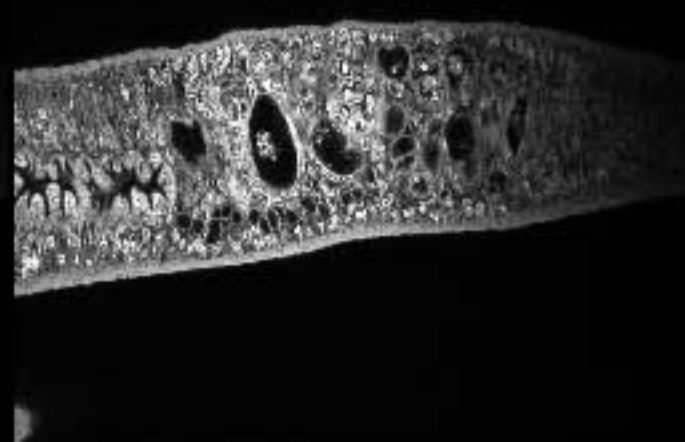

Supplement: ppat.1005423.s007.pdf [file ppat.1005423.s007.pdf]
