# Supplementary material for: MicroRNAs Are Involved in the Regulation of Ovary Development in the Pathogenic Blood Fluke Schistosoma japonicum
Source: PubMed Central journal article supplement (PMC4752461; doi:10.1371/journal.ppat.1005423), 2016-02-12
Supplement: ppat.1005423.s008.pdf [file ppat.1005423.s008.pdf]

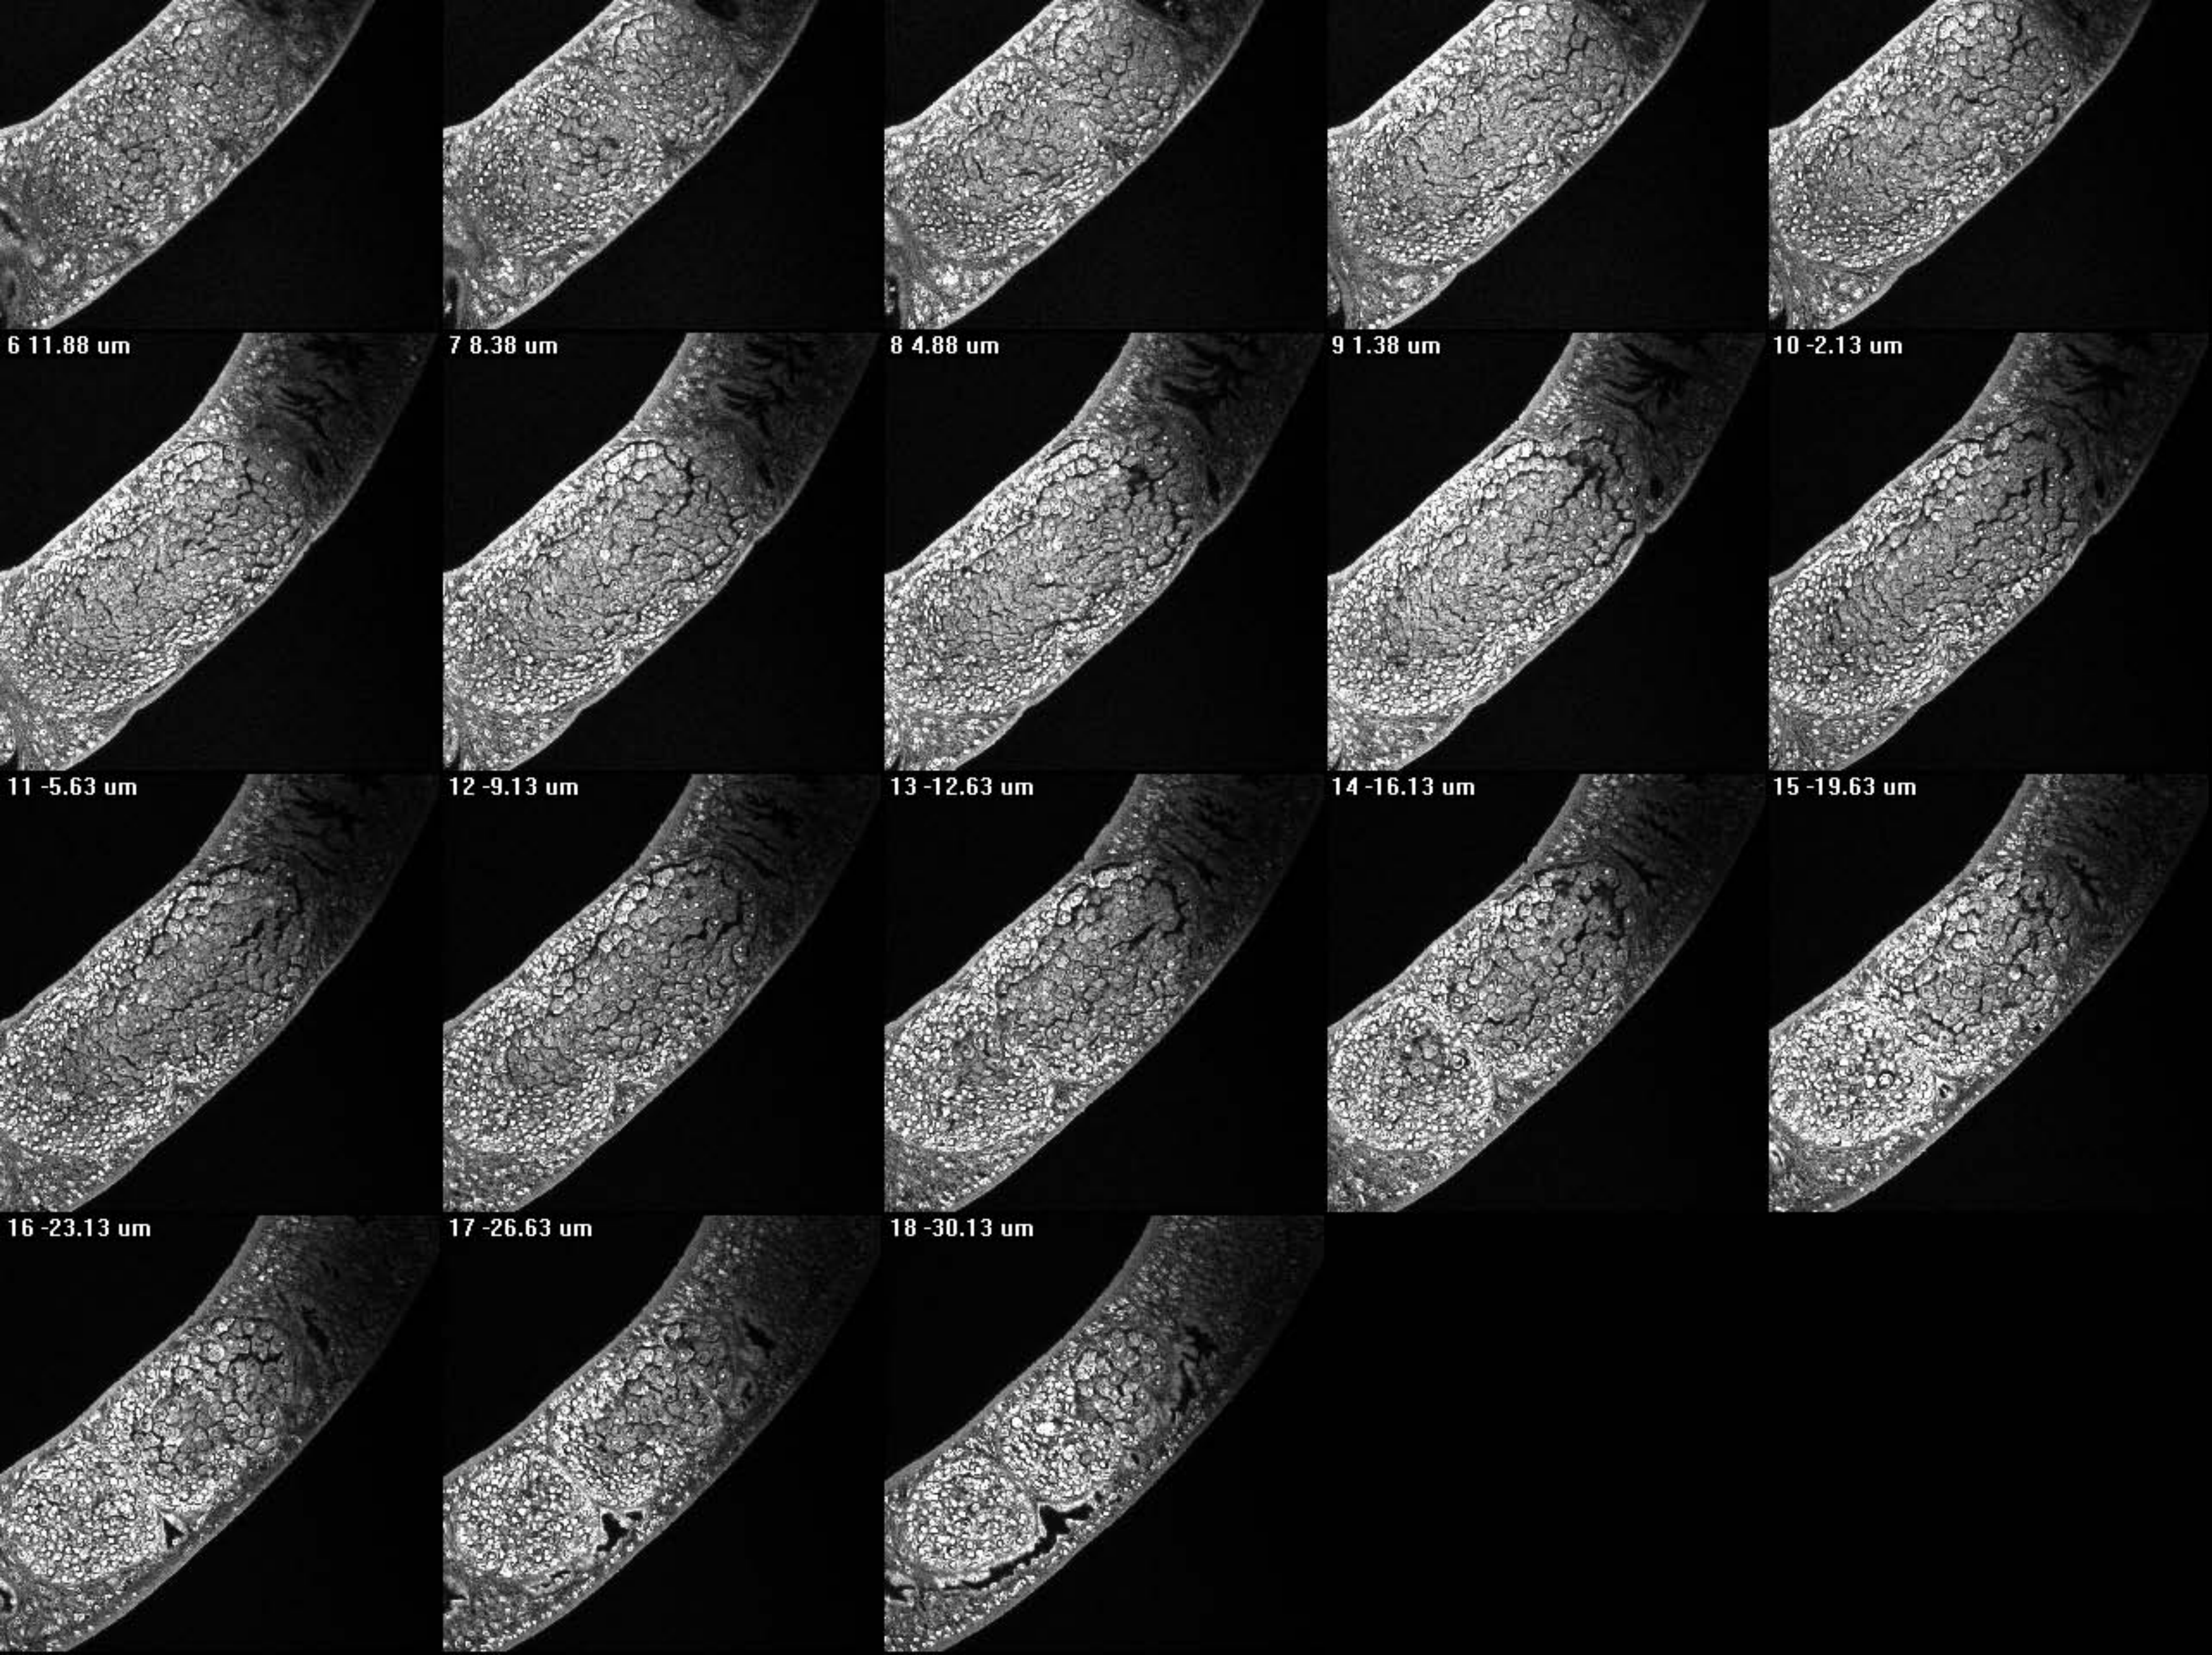

6 11.88 um

7 8.38 um

8 4.88 um

9 1.38 um

10 -2.13 um

11 -5.63 um

12 -9.13 um

13 -12.63 um

14 -16.13 um

15 -19.63 um

16 -23.13 um

17 -26.63 um

18 -30.13 um
