# Supplementary material for: MicroRNAs Are Involved in the Regulation of Ovary Development in the Pathogenic Blood Fluke Schistosoma japonicum
Source: PubMed Central journal article supplement (PMC4752461; doi:10.1371/journal.ppat.1005423), 2016-02-12

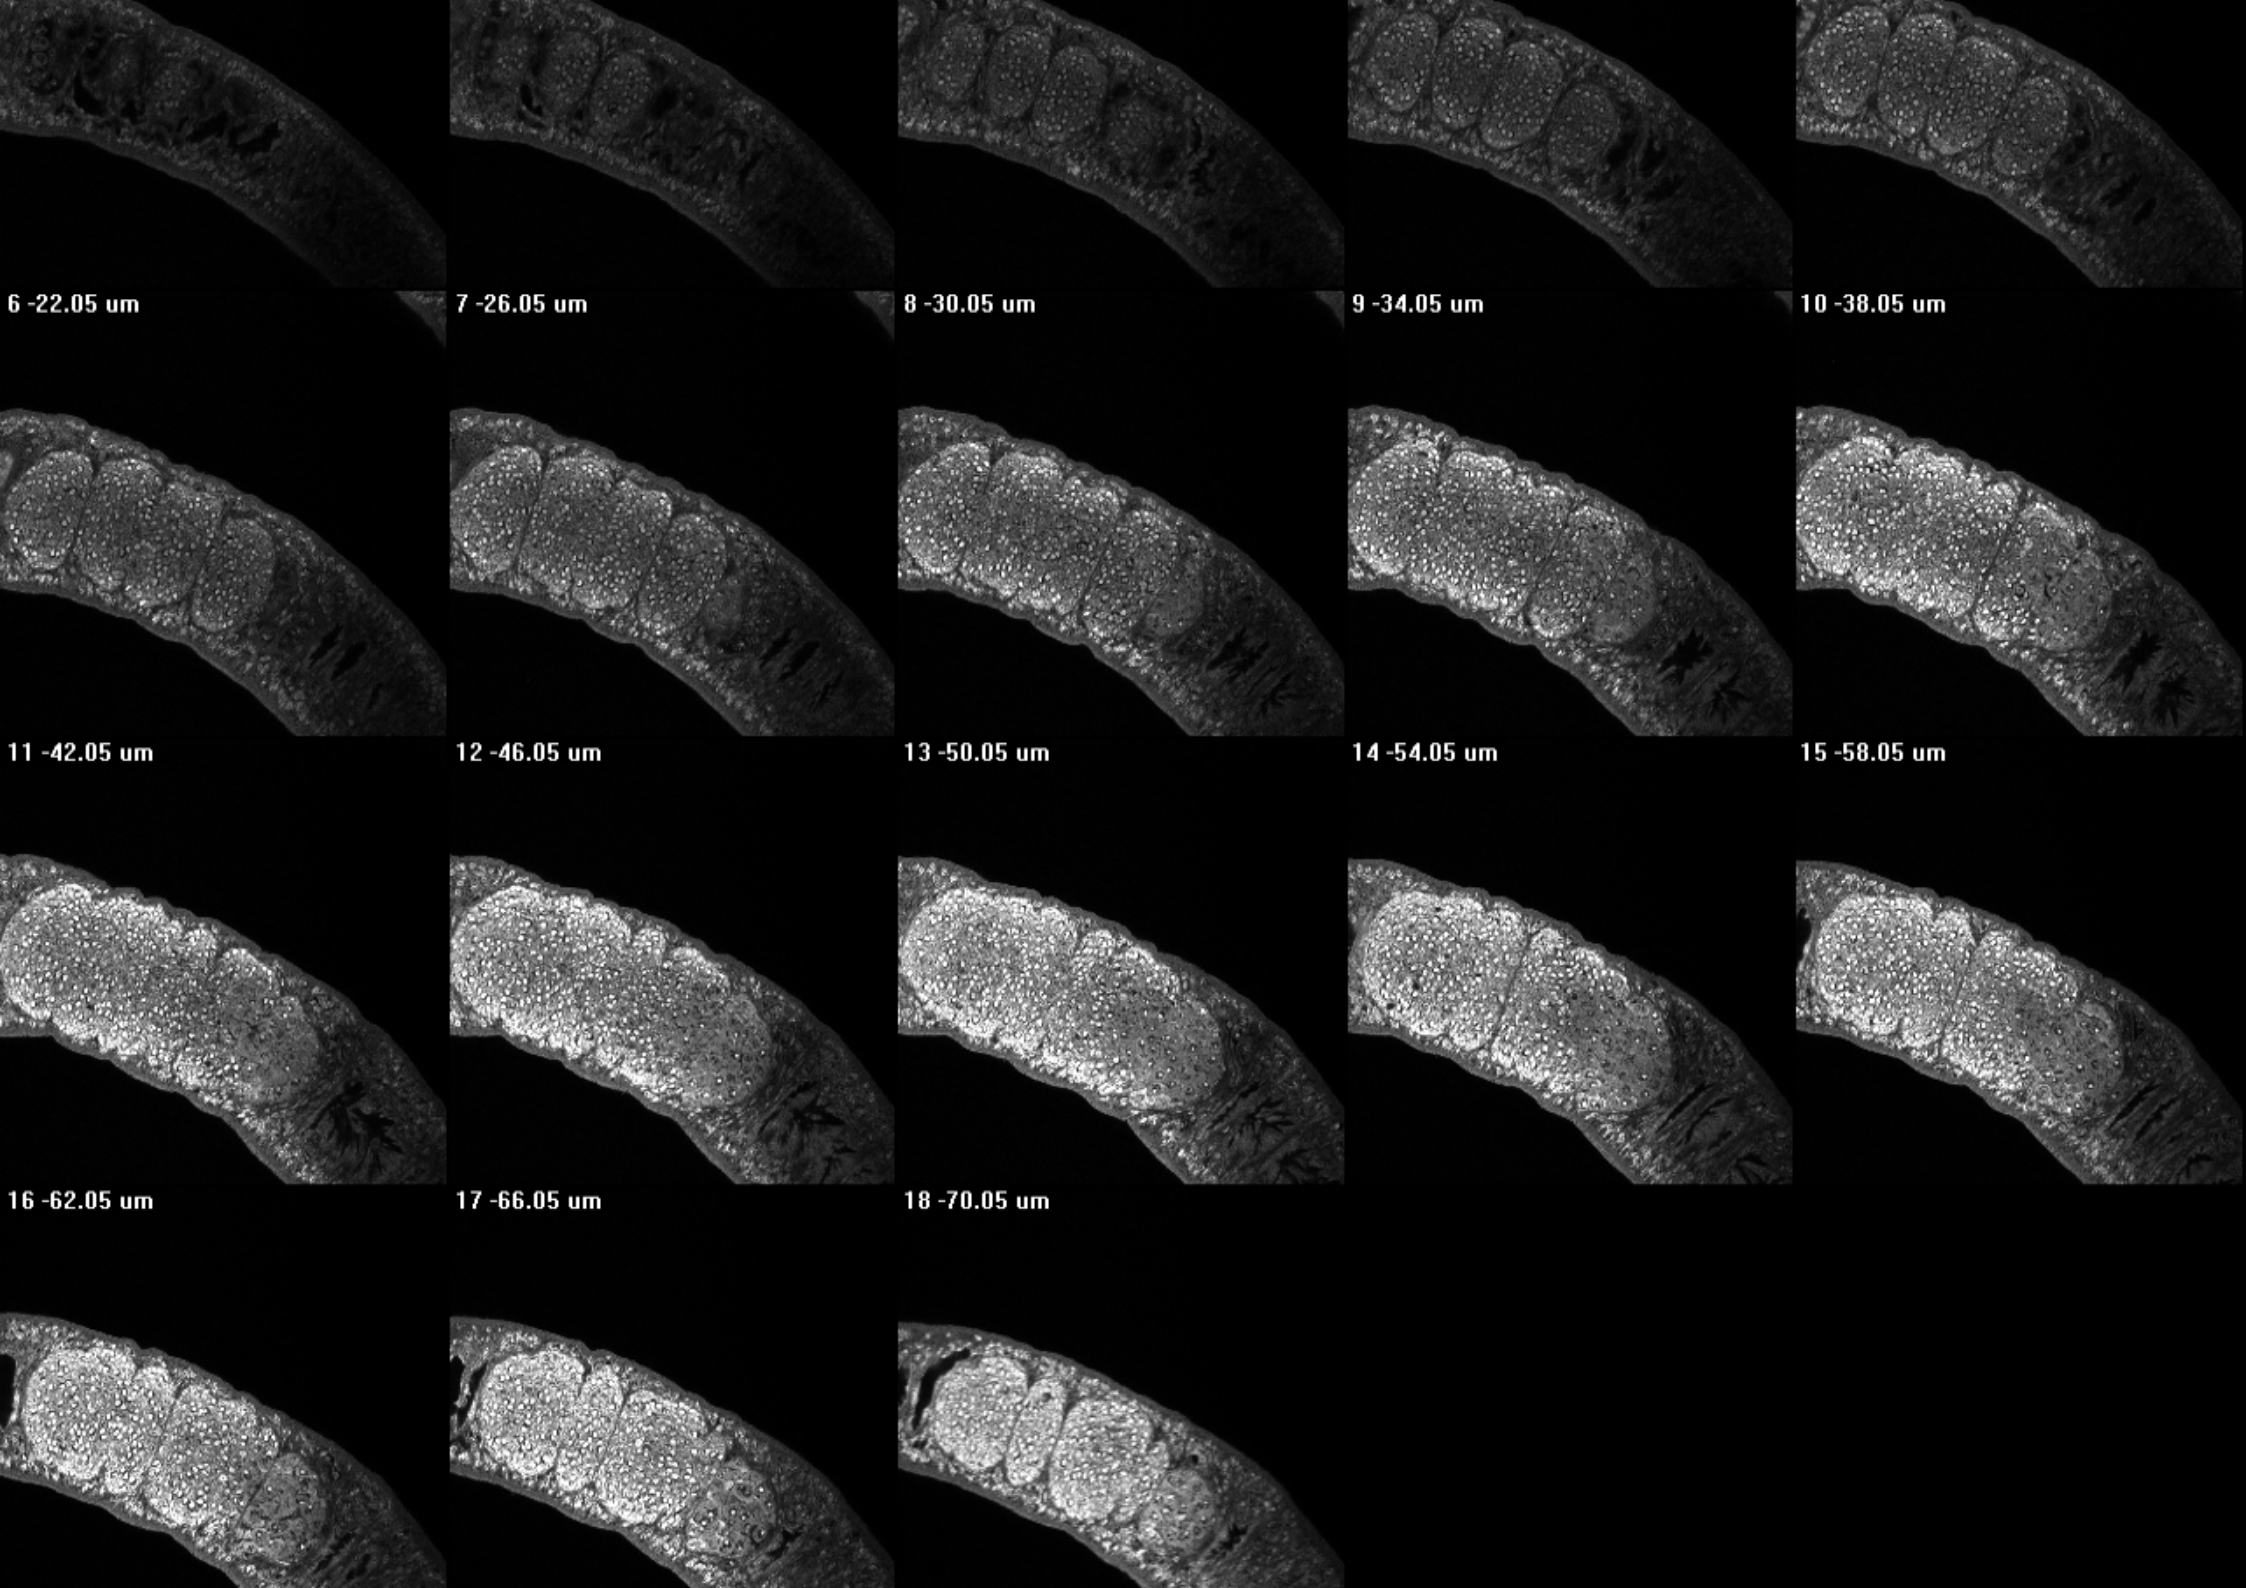

Supplement: ppat.1005423.s010.pdf [file ppat.1005423.s010.pdf]
