# Supplementary material for: MicroRNAs Are Involved in the Regulation of Ovary Development in the Pathogenic Blood Fluke Schistosoma japonicum
Source: PubMed Central journal article supplement (PMC4752461; doi:10.1371/journal.ppat.1005423), 2016-02-12
Supplement: ppat.1005423.s013.pdf [file ppat.1005423.s013.pdf]

```

#sja-bantam
AAGTCGGCTTTTATTGCGCTCTGAGAAAAACCAATTCATTGCTTTTTTTTATTATCTGAGATCGCGATTAAGCTGGTTT
Total sRNA: 218038      shared 5' end with miRNA: 129751  shared 3' end with miRNA: 19
miRNA
.....UGAGAUCGCGAUUAAAGCU.....      19      88059
Shared 5' Terminus
.....UGAGAUCGCGAUUAAAGC.....      18      34968
.....UGAGAUCGCGAUUAAAGCUG.....      20      24052
.....UGAGAUCGCGAUUAAAGCUGG...      21      15318
.....UGAGAUCGCGAUUAAAGCUGGU..      22      53818
.....UGAGAUCGCGAUUAAAGCUGGUU.      23      984
.....UGAGAUCGCGAUUAAAGCUGGUUU      24      611
Shared 3' Terminus
.....GAGAUCGCGAUUAAAGCU.....      18      15
Subsequence
Others
....CGGCUUUUAUUGCGCUCUGA.....      20      5
....CGGCUUUUAUUGCGCUCUGAGA.....      22      46
.....AAAACCAAUUCAUUGCUUUUU.....      21      9
.....AAAACCAAUUCAUUGCUUUUU.....      22      5
.....GAGAUCGCGAUUAAAGCUG.....      19      13
.....GAGAUCGCGAUUAAAGCUGG...      20      8
.....GAGAUCGCGAUUAAAGCUGGU..      21      87
.....GAGAUCGCGAUUAAAGCUGGUU.      22      5
antisense match

```

```

#sja-let-7
TGGGAGGTAGTTCGTTGTGTGGTTTGCTTATATAAATGATCTTAAGAAGACCATACAACCGACTGGCTTTCCCA
Total sRNA: 317022      shared 5' end with miRNA: 39924  shared 3' end with miRNA: 714
miRNA
..GGAGGUAGUUCGUUGUGUGGU.....      21      258334
Shared 5' Terminus
..GGAGGUAGUUCGUUGUGU.....      18      1101
..GGAGGUAGUUCGUUGUGUG.....      19      1402
..GGAGGUAGUUCGUUGUGUGG.....      20      7735
..GGAGGUAGUUCGUUGUGUGUU.....      22      25526
..GGAGGUAGUUCGUUGUGUGUUU.....      23      4154
..GGAGGUAGUUCGUUGUGUGUUUG.....      24      5
Shared 3' Terminus
....GGUAGUUCGUUGUGUGGU.....      18      43
....AGGUAGUUCGUUGUGUGGU.....      19      84
....GAGGUAGUUCGUUGUGUGGU.....      20      580
..GGGAGGUAGUUCGUUGUGUGGU.....      22      6
Subsequence
...GAGGUAGUUCGUUGUGUG.....      18      327
...GAGGUAGUUCGUUGUGUGG.....      19      72
...AGGUAGUUCGUUGUGUGG.....      18      19
Others
...GAGGUAGUUCGUUGUGUGUU.....      21      169
...GAGGUAGUUCGUUGUGUGUUU.....      22      160
...AGGUAGUUCGUUGUGUGUUU.....      20      26
...AGGUAGUUCGUUGUGUGUUU.....      21      21
....GGUAGUUCGUUGUGUGUU.....      19      5
.....UAGUUCGUUGUGUGUUUGC.....      20      7
.....UAGUUCGUUGUGUGUUUGCU.....      21      14
.....UAGUUCGUUGUGUGUUUGCUU.....      22      40
.....UUGC UUAUAAAAUGAUCUU.....      20      7
.....UUGC UUAUAAAAUGAUCUUA.....      21      16
.....UUGC UUAUAAAAUGAUCUUA.....      22      8
.....UUGC UUAUAAAAUGAUCUUAAGAAGAC.....      28      9
.....GCUUAUAAAAUGAUCUUAAGAAGAC.....      26      6
.....UUAUAAAAUGAUCUUAAGAAGA.....      23      5
.....UAUAAAAUGAUCUUAAGAAGAC.....      23      5
.....GAAGACCAUACAACCGACUGGCU.....      23      21
.....AAGACCAUACAACCGACUGGCU.....      22      7
.....AAGACCAUACAACCGACUGGCUUU.....      24      5
.....AAGACCAUACAACCGACUGGCUUUC.....      25      6
.....CCAUACAACCGACUGGCUUUC.....      21      5

```

```

.....CCAUACAACCGACUGGCUUCC. 23 11
.....CCAUACAACCGACUGGCUUCCCA 24 39
.....CAUACAACCGACUGGCUU..... 18 22
.....CAUACAACCGACUGGCUUU... 19 74
.....CAUACAACCGACUGGCUUUC.. 20 731
.....CAUACAACCGACUGGCUUCC.. 21 1397
.....CAUACAACCGACUGGCUUCC. 22 1857
.....CAUACAACCGACUGGCUUCCCA 23 8932
.....AUACAACCGACUGGCUUU... 18 22
.....AUACAACCGACUGGCUUUC... 19 192
.....AUACAACCGACUGGCUUCC.. 20 258
.....AUACAACCGACUGGCUUCC. 21 768
.....AUACAACCGACUGGCUUCCCA 22 2566
.....UACAACCGACUGGCUUCC.. 19 8
.....UACAACCGACUGGCUUCC. 20 13
.....UACAACCGACUGGCUUCCCA 21 63
.....ACAACCGACUGGCUUCCCA 20 52

```

antisense match

#sja-let-7b

GTGAATAACTGGAAAGAGGTAGTGTATTCATATGACTACTGTGTCTCTTGTGTGTGTATGTATAGAAAATGTAAAAAATATGTTGTAAACAACATACTAAACATTGAAAAAATTAATCTTTTTCAATGAAATTTCTTTGTATACACACATATAAGGTGGTTACATTTTAAATGGAAGTCATATGTCTACTAGTCTTATACGGGATTCAC  
Total sRNA: 703318 shared 5' end with miRNA: 46238 shared 3' end with miRNA: 714

```

miRNA
.....AGAGGUAGUGAUUCAUAUGACU..... 22 655165
Shared 5' Terminus
.....AGAGGUAGUGAUUCAUAU..... 18 542
.....AGAGGUAGUGAUUCAUAUG..... 19 1256
.....AGAGGUAGUGAUUCAUAUGA..... 20 5968
.....AGAGGUAGUGAUUCAUAUGAC..... 21 38234
.....AGAGGUAGUGAUUCAUAUGACUA..... 23 235
Shared 3' Terminus
.....AGGUAGUGAUUCAUAUGACU..... 20 235
.....GAGGUAGUGAUUCAUAUGACU..... 21 233
.....AAGAGGUAGUGAUUCAUAUGACU..... 23 244
Subsequence
.....GAGGUAGUGAUUCAUAUGAC..... 20 39
.....AGGUAGUGAUUCAUAUGAC..... 19 34
Others
.....AAGAGGUAGUGAUUCAUAU..... 19 9
.....AAGAGGUAGUGAUUCAUAUG..... 20 6
.....AAGAGGUAGUGAUUCAUAUGA..... 21 62
.....AAGAGGUAGUGAUUCAUAUGAC..... 22 446
.....AGGUAGUGAUUCAUAUGACUA..... 21 5
.....UCAUAGUCUCACUAGCU..... 18 5
.....UCAUAGUCUCACUAGCUU..... 19 5
.....UCAUAGUCUCACUAGCUUC..... 20 28
.....UCAUAGUCUCACUAGCUUCA..... 21 93
.....UCAUAGUCUCACUAGCUUCAU..... 22 299
.....UCAUAGUCUCACUAGCUUCAU..... 23 130
.....CAUAGUCUCACUAGCUUCAU..... 22 15
.....AUAUGUCUCACUAGCUUCAU..... 21 7

```

antisense match

#sja-let-7s

TCAGTATCAGTGAAGTAGTGTAGTGTACGACTGTTGTGAATTGAGGTCGTCCAGTCGACTATCTAATGTGTTCAGAAATCTCATTCACTGATGTATCAGTTAATGTGATTTTGTAAATTTGTAAATTTGTGAATAATGTGAGTTGATATATGTAGGTGAAGTGGTTATTCTGACATATTTGGTTAGTTGTACTGGTTGACAGCCGTACACCTTTACTACCATGCTGGTGATAC  
Total sRNA: 322698 shared 5' end with miRNA: 153285 shared 3' end with miRNA: 35777

```

miRNA
.....GAGGUAGUUAGAUGUACGACU..... 21 111993
Shared 5' Terminus
.....GAGGUAGUUAGAUGUACG..... 18 290
.....GAGGUAGUUAGAUGUACGA..... 19 4044
.....GAGGUAGUUAGAUGUACGAC..... 20 8671
.....GAGGUAGUUAGAUGUACGACUG..... 22 78507
.....GAGGUAGUUAGAUGUACGACUGU..... 23 56913
.....GAGGUAGUUAGAUGUACGACUGUU..... 24 4844
.....GAGGUAGUUAGAUGUACGACUGUUG..... 25 12
Shared 3' Terminus
.....GGUAGUUAGAUGUACGACU..... 19 52
.....AGGUAGUUAGAUGUACGACU..... 20 136
.....UGAGGUAGUUAGAUGUACGACU..... 22 35586
Subsequence
.....AGGUAGUUAGAUGUACGAC..... 19 9
.....GGUAGUUAGAUGUACGAC..... 18 10
Others
.....UGAGGUAGUUAGAUGUAC..... 18 22
.....UGAGGUAGUUAGAUGUACG..... 19 86
.....UGAGGUAGUUAGAUGUACGA..... 20 2454
.....UGAGGUAGUUAGAUGUACGAC..... 21 3677
.....UGAGGUAGUUAGAUGUACGACUG..... 23 10045
.....UGAGGUAGUUAGAUGUACGACUGU..... 24 930
.....UGAGGUAGUUAGAUGUACGACUGUU..... 25 39
.....AGGUAGUUAGAUGUACGACUG..... 21 195
.....AGGUAGUUAGAUGUACGACUGU..... 22 273
.....AGGUAGUUAGAUGUACGACUGUU..... 23 58
.....GGUAGUUAGAUGUACGACUG..... 20 314
.....GGUAGUUAGAUGUACGACUGU..... 21 141
.....GGUAGUUAGAUGUACGACUGUU..... 22 67

```

|                                   |    |      |
|-----------------------------------|----|------|
| .....GUAGUUAGAUGUACGACUG.....     | 19 | 6    |
| .....GUAGUUAGAUGUACGACUG.....     | 20 | 6    |
| .....UGACAUAUUGGUUAGUUGUACU.....  | 22 | 7    |
| .....UGACAUAUUGGUUAGUUGUACUG..... | 23 | 65   |
| .....AGCCGUACACCUUACUACCAU.....   | 21 | 9    |
| .....AGCCGUACACCUUACUACCAUG.....  | 22 | 17   |
| .....GCCGUACACCUUACUACCA.....     | 19 | 6    |
| .....GCCGUACACCUUACUACCAU.....    | 20 | 81   |
| .....GCCGUACACCUUACUACCAUG.....   | 21 | 250  |
| .....GCCGUACACCUUACUACCAUG.....   | 22 | 2712 |
| .....GCCGUACACCUUACUACCAUGCU..... | 23 | 53   |
| .....CCGUACACCUUACUACCAUG.....    | 21 | 33   |
| .....CCGUACACCUUACUACCAUGCU.....  | 22 | 22   |
| .....CGUACACCUUACUACCAUG.....     | 20 | 8    |
| .....CGUACACCUUACUACCAUGCU.....   | 21 | 7    |

antisense match

#sja-lin-4  
NNTCCCTGAGACCTTAGAGTTGTNN  
Total sRNA: 24734 shared 5' end with miRNA: 959      shared 3' end with miRNA: 208

|                              |    |       |
|------------------------------|----|-------|
| miRNA                        |    |       |
| ..UCCCUGAGACCUUAGAGUUGU..    | 21 | 23558 |
| Shared 5' Terminus           |    |       |
| ..UCCCUGAGACCUUAGAGU....     | 18 | 78    |
| ..UCCCUGAGACCUUAGAGUU....    | 19 | 126   |
| ..UCCCUGAGACCUUAGAGUUG... 20 |    | 755   |
| Shared 3' Terminus           |    |       |
| ....CCUGAGACCUUAGAGUUGU..    | 19 | 205   |
| Subsequence                  |    |       |
| ....CCUGAGACCUUAGAGUUG... 18 |    | 9     |
| Others                       |    |       |
| antisense match              |    |       |

#sja-mir-1  
CAAAAGTAGTATTTCATTATATGGAATGTGGCGAAGTATGGTCTACAGTTGCTAGAAATCATCTTTATATGAAGAGTATTCACCTTTT  
Total sRNA: 9075799      shared 5' end with miRNA: 4455011      shared 3' end with miRNA: 20575

|                                       |    |         |
|---------------------------------------|----|---------|
| miRNA                                 |    |         |
| .....UGGAAUGUGGCGAAGUAUGGUC.....      | 22 | 4570978 |
| Shared 5' Terminus                    |    |         |
| .....UGGAAUGUGGCGAAGUAU.....          | 18 | 36283   |
| .....UGGAAUGUGGCGAAGUAUG.....         | 19 | 65142   |
| .....UGGAAUGUGGCGAAGUAUGG.....        | 20 | 486032  |
| .....UGGAAUGUGGCGAAGUAUGGU.....       | 21 | 2957888 |
| .....UGGAAUGUGGCGAAGUAUGGUCU.....     | 23 | 905778  |
| .....UGGAAUGUGGCGAAGUAUGGUCUA.....    | 24 | 3877    |
| .....UGGAAUGUGGCGAAGUAUGGUCUAC.....   | 25 | 11      |
| Shared 3' Terminus                    |    |         |
| .....AAUGUGGCGAAGUAUGGUC.....         | 19 | 8       |
| .....GAAUGUGGCGAAGUAUGGUC.....        | 20 | 640     |
| .....GAAUGUGGCGAAGUAUGGUC.....        | 21 | 18090   |
| .....AUGGAAUGUGGCGAAGUAUGGUC.....     | 23 | 1766    |
| .....UAUGGAAUGUGGCGAAGUAUGGUC.....    | 24 | 50      |
| .....UAUAUGGAAUGUGGCGAAGUAUGGUC.....  | 26 | 6       |
| .....UUAUAUGGAAUGUGGCGAAGUAUGGUC..... | 27 | 13      |
| Subsequence                           |    |         |
| .....GAAUGUGGCGAAGUAUG.....           | 18 | 97      |
| .....GAAUGUGGCGAAGUAUGG.....          | 19 | 1730    |
| .....GAAUGUGGCGAAGUAUGGU.....         | 20 | 11082   |
| .....GAAUGUGGCGAAGUAUGG.....          | 18 | 41      |
| .....GAAUGUGGCGAAGUAUGGU.....         | 19 | 307     |
| Others                                |    |         |
| .....UAUAUGGAAUGUGGCGAAGUAUGGU.....   | 25 | 7       |
| .....UAUGGAAUGUGGCGAAGUA.....         | 19 | 15      |
| .....UAUGGAAUGUGGCGAAGUAU.....        | 20 | 37      |
| .....UAUGGAAUGUGGCGAAGUAUG.....       | 21 | 46      |
| .....UAUGGAAUGUGGCGAAGUAUGG.....      | 22 | 618     |
| .....UAUGGAAUGUGGCGAAGUAUGGU.....     | 23 | 1978    |
| .....UAUGGAAUGUGGCGAAGUAUGGUCU.....   | 25 | 19      |
| .....AUGGAAUGUGGCGAAGUA.....          | 18 | 36      |
| .....AUGGAAUGUGGCGAAGUAU.....         | 19 | 49      |
| .....AUGGAAUGUGGCGAAGUAUG.....        | 20 | 106     |
| .....AUGGAAUGUGGCGAAGUAUGG.....       | 21 | 1077    |

```

.....AUGGAAUGUGGCGAAGUAUGGU..... 22      8293
.....AUGGAAUGUGGCGAAGUAUGGUCU..... 24      307
.....GGA AUGUGGCGAAGUAUGGUCU..... 22      3222
.....GGA AUGUGGCGAAGUAUGGUCUA..... 23      28
.....GAAUGUGGCGAAGUAUGGUCU..... 21      111
.....UGUGGCGAAGUAUGGUCU..... 18      5
antisense match

```

```

#sja-mir-10
CCTCAGTATGAACCCGTGACCCGAGTTTGGATGCCGTTAGATGCAAAATTCGAGTCTATAAGGAAAGATACTTTGGAA
Total sRNA: 90192shared 5' end with miRNA: 11435  shared 3' end with miRNA: 258
miRNA

```

```

.....AACCCUGUAGACCCGAGUUUG..... 22      77153
Shared 5' Terminus
.....AACCCUGUAGACCCGAGU..... 18      282
.....AACCCUGUAGACCCGAGUU..... 19      109
.....AACCCUGUAGACCCGAGUUU..... 20      799
.....AACCCUGUAGACCCGAGUUUG..... 21      4176
.....AACCCUGUAGACCCGAGUUUGGA..... 23      6022
.....AACCCUGUAGACCCGAGUUUGGAU..... 24      44
Shared 3' Terminus
.....CCUGUAGACCCGAGUUUG..... 19      7
.....ACCCUGUAGACCCGAGUUUG..... 21      188
.....GAACCCUGUAGACCCGAGUUUG..... 23      62
Subsequence
.....ACCCUGUAGACCCGAGUUUG..... 20      8
.....CCUGUAGACCCGAGUUUG..... 18      5
Others
.....GAACCCUGUAGACCCGAGUUU..... 21      5
.....GAACCCUGUAGACCCGAGUUUG..... 22      13
.....GAACCCUGUAGACCCGAGUUUGGA..... 24      9
.....ACCCUGUAGACCCGAGUUUGGA..... 22      20
.....AAAUUCGAGUCUAUAAGG..... 18      12
.....AAAUUCGAGUCUAUAAGGA..... 19      100
.....AAAUUCGAGUCUAUAAGGAA..... 20      184
.....AAAUUCGAGUCUAUAAGGAAA..... 21      219
.....AAAUUCGAGUCUAUAAGGAAAG..... 22      152
.....AAAUUCGAGUCUAUAAGGAAAGA..... 23      499
.....AAUUCGAGUCUAUAAGGAA..... 19      13
.....AAUUCGAGUCUAUAAGGAAA..... 20      11
.....AAUUCGAGUCUAUAAGGAAAG..... 21      7
.....AAUUCGAGUCUAUAAGGAAAGA..... 22      38
.....UUCGAGUCUAUAAGGAAAGA..... 20      19
antisense match

```

```

#sja-mir-1175
GATATGTACGGTTGGAGTTTTTGTCTTCTGCACCAGCCACATATCAGTCTGATTGATACTCCTCACTGTAGGAGATTTTGTCAAATGAACCTGGTGAGATTCAATTA CTTCAACTGTTATATC
Total sRNA: 39868shared 5' end with miRNA: 18988  shared 3' end with miRNA: 59
miRNA

```

```

.....UGAGAUCAAUUACUUCACUG..... 22      20657
Shared 5' Terminus
.....UGAGAUCAAUUACUUCU..... 18      26
.....UGAGAUCAAUUACUUCAA..... 19      154
.....UGAGAUCAAUUACUUCAC..... 20      576
.....UGAGAUCAAUUACUUCACU..... 21      18150
.....UGAGAUCAAUUACUUCACUG..... 23      80
Shared 3' Terminus
.....GAGAUCAAUUACUUCACUG..... 21      50
.....GUGAGAUCAAUUACUUCACUG..... 23      7
Subsequence
.....GAGAUCAAUUACUUCACU..... 20      46
.....AGAUCAAUUACUUCACU..... 19      5
Others
.....GUUGGAGUUUUUGUUUCUGC..... 20      6
.....GUUGGAGUUUUUGUUUCUGCACC..... 23      22
.....UGGAGUUUUUGUUUCUGCACC..... 21      5
.....UGGAGUUUUUGUUUCUGCACCAG..... 23      17

```

.....GUGAGAUCAAUUACUCCAACU..... 22 18  
 antisense match

#sja-mir-124  
 TATATGTATGCCATTTTCCGCGATTGCCTTGATTTGTAAAAGAAAATGATTCACAACAAAATATTAAGGCACGCGGTGAATGTCATCCACGGTGC  
 Total sRNA: 393245 shared 5' end with miRNA: 47347 shared 3' end with miRNA: 1360  
 miRNA

|                                    |    |        |
|------------------------------------|----|--------|
| .....UAAGGCACGCGGUGAAUGUCA.....    | 21 | 343967 |
| Shared 5' Terminus                 |    |        |
| .....UAAGGCACGCGGUGAAUG.....       | 18 | 3534   |
| .....UAAGGCACGCGGUGAAUGU.....      | 19 | 14185  |
| .....UAAGGCACGCGGUGAAUGUC.....     | 20 | 21251  |
| .....UAAGGCACGCGGUGAAUGUCAU.....   | 22 | 8348   |
| .....UAAGGCACGCGGUGAAUGUCAUC.....  | 23 | 27     |
| Shared 3' Terminus                 |    |        |
| .....AGGCACGCGGUGAAUGUCA.....      | 19 | 97     |
| .....AAGGCACGCGGUGAAUGUCA.....     | 20 | 1258   |
| Subsequence                        |    |        |
| .....AAGGCACGCGGUGAAUGU.....       | 18 | 38     |
| .....AAGGCACGCGGUGAAUGUC.....      | 19 | 85     |
| Others                             |    |        |
| .....CCAUUUCCGCGAUUGCCUUGA.....    | 22 | 18     |
| .....CCAUUUCCGCGAUUGCCUUGAU.....   | 23 | 55     |
| .....CCAUUUCCGCGAUUGCCUUGAAU.....  | 24 | 9      |
| .....CCAUUUCCGCGAUUGCCUUGAUUU..... | 25 | 15     |
| .....AAGGCACGCGGUGAAUGUCAU.....    | 21 | 307    |
| .....AGGCACGCGGUGAAUGUCAU.....     | 20 | 18     |
| antisense match                    |    |        |

#sja-mir-125a  
 GTCCTTGAGACCCTTTGATTGTCTCGTTAAACATAATTCTATATGTTAAATGTAATCAGGCAGCCAAAGTGACTCAGGTGTGC  
 Total sRNA: 19210 shared 5' end with miRNA: 9825 shared 3' end with miRNA: 32  
 miRNA

|                                |    |      |
|--------------------------------|----|------|
| ..UCCUGAGACCCUUUGAUUGUC.....   | 22 | 8825 |
| Shared 5' Terminus             |    |      |
| ..UCCUGAGACCCUUUGAU.....       | 18 | 11   |
| ..UCCUGAGACCCUUUGAAU.....      | 19 | 30   |
| ..UCCUGAGACCCUUUGAUUG.....     | 20 | 1689 |
| ..UCCUGAGACCCUUUGAUUGU.....    | 21 | 8081 |
| ..UCCUGAGACCCUUUGAUUGUCU.....  | 23 | 14   |
| Shared 3' Terminus             |    |      |
| .....UGAGACCCUUUGAUUGUC.....   | 18 | 13   |
| .....CCUGAGACCCUUUGAUUGUC..... | 20 | 16   |
| Subsequence                    |    |      |
| .....CCUGAGACCCUUUGAUUGU.....  | 19 | 6    |
| Others                         |    |      |
| .....CAGCCAAAGUGACUCAGGUGU..   | 21 | 8    |
| .....CAGCCAAAGUGACUCAGGUGUG.   | 22 | 60   |
| .....CAGCCAAAGUGACUCAGGUGUGC   | 23 | 389  |
| .....AGCCAAAGUGACUCAGGUGUG.    | 21 | 5    |
| .....AGCCAAAGUGACUCAGGUGUGC    | 22 | 35   |
| .....GCCAAAGUGACUCAGGUGUGC     | 21 | 7    |
| antisense match                |    |      |

#sja-mir-125b  
 ATCCCTGAGACTGATAATTGCTCTAGTTATTATATCATTAATGAGTTTACAATAAGGGCAATTATTATTCTCAGGTGT  
 Total sRNA: 1007585 shared 5' end with miRNA: 185419 shared 3' end with miRNA: 3526  
 miRNA

|                              |    |        |
|------------------------------|----|--------|
| .UCCUGAGACUGAUAUUGCU.....    | 21 | 816687 |
| Shared 5' Terminus           |    |        |
| .UCCUGAGACUGAUAUU.....       | 18 | 3281   |
| .UCCUGAGACUGAUAUUG.....      | 19 | 3447   |
| .UCCUGAGACUGAUAUUGC.....     | 20 | 49025  |
| .UCCUGAGACUGAUAUUGCUC.....   | 22 | 127999 |
| .UCCUGAGACUGAUAUUGCUCU.....  | 23 | 1659   |
| .UCCUGAGACUGAUAUUGCUCUA..... | 24 | 8      |

|                                |    |      |
|--------------------------------|----|------|
| Shared 3' Terminus             |    |      |
| ...CUGAGACUGAUAUUUGCU.....     | 18 | 249  |
| ..CCUGAGACUGAUAUUUGCU.....     | 19 | 2293 |
| .CCCUGAGACUGAUAUUUGCU.....     | 20 | 201  |
| AUCCUGAGACUGAUAUUUGCU.....     | 22 | 783  |
| Subsequence                    |    |      |
| ..CCCUGAGACUGAUAUUUGC.....     | 19 | 11   |
| ...CCUGAGACUGAUAUUUGC.....     | 18 | 103  |
| Others                         |    |      |
| AUCCUGAGACUGAUAUUU.....        | 19 | 5    |
| AUCCUGAGACUGAUAUUUG.....       | 20 | 5    |
| AUCCUGAGACUGAUAUUUGC.....      | 21 | 61   |
| AUCCUGAGACUGAUAUUUGCUC.....    | 23 | 109  |
| AUCCUGAGACUGAUAUUUGCUCU.....   | 24 | 8    |
| ..CCCUGAGACUGAUAUUUGCUC.....   | 21 | 113  |
| ..CCCUGAGACUGAUAUUUGCUCU.....  | 22 | 15   |
| ...CCUGAGACUGAUAUUUGCUC.....   | 20 | 948  |
| ..CCUGAGACUGAUAUUUGCUCU.....   | 21 | 13   |
| ...CUGAGACUGAUAUUUGCUC.....    | 19 | 97   |
| ....UGAGACUGAUAUUUGCUC.....    | 18 | 125  |
| .....GCAAUUUUUUUCUCAGG.....    | 18 | 9    |
| .....GCAAUUUUUUUCUCAGGU.....   | 19 | 14   |
| .....GCAAUUUUUUUCUCAGGUG.....  | 20 | 24   |
| .....GCAAUUUUUUUCUCAGGUGU..... | 21 | 264  |
| .....CAAUUUUUUUCUCAGGUGU.....  | 20 | 8    |
| .....AAUUUUUUUCUCAGGUGU.....   | 19 | 8    |

antisense match

#sja-mir-190

CGACAGTAAACTGGTTCGATGTGATATGTATGGGTACTTGGTGTGTCAGCGGATAACATGTTTTATTTCGCCATTAAGCAATACACCAGTGACCAGACATATCCCTATCGCTTAGTTTAGATCCTC

Total sRNA: 296653 shared 5' end with miRNA: 99577 shared 3' end with miRNA: 508

miRNA

|                                      |    |        |
|--------------------------------------|----|--------|
| .....UGAUAUGUAUGGGUUACUUGGU.....     | 22 | 183425 |
| Shared 5' Terminus                   |    |        |
| .....UGAUAUGUAUGGGUUACU.....         | 18 | 579    |
| .....UGAUAUGUAUGGGUUACUU.....        | 19 | 1702   |
| .....UGAUAUGUAUGGGUUACUUG.....       | 20 | 3007   |
| .....UGAUAUGUAUGGGUUACUUGG.....      | 21 | 22892  |
| .....UGAUAUGUAUGGGUUACUUGGUG.....    | 23 | 65437  |
| .....UGAUAUGUAUGGGUUACUUGGUGU.....   | 24 | 5881   |
| .....UGAUAUGUAUGGGUUACUUGGUGUC.....  | 25 | 59     |
| .....UGAUAUGUAUGGGUUACUUGGUGUCA..... | 26 | 20     |
| Shared 3' Terminus                   |    |        |
| .....AUGUAUGGGUUACUUGGU.....         | 18 | 11     |
| .....UAUGUAUGGGUUACUUGGU.....        | 19 | 5      |
| .....AUAUGUAUGGGUUACUUGGU.....       | 20 | 13     |
| .....GAUAUGUAUGGGUUACUUGGU.....      | 21 | 466    |
| .....GUGAUAUGUAUGGGUUACUUGGU.....    | 23 | 6      |
| .....UGUGAUAUGUAUGGGUUACUUGGU.....   | 24 | 6      |
| Subsequence                          |    |        |
| .....GAUAUGUAUGGGUUACUUG.....        | 19 | 5      |
| .....GAUAUGUAUGGGUUACUUGG.....       | 20 | 56     |
| .....AUAUGUAUGGGUUACUUGG.....        | 19 | 6      |
| Others                               |    |        |
| ..GACAGUAAACUGGUCGAUG.....           | 19 | 11     |
| ..ACAGUAAACUGGUCGAUG.....            | 18 | 5      |
| .....AUGUGAUAUGUAUGGGUUACUUG.....    | 23 | 6      |
| .....AUGUGAUAUGUAUGGGUUACUUGG.....   | 24 | 13     |
| .....UGUGAUAUGUAUGGGUUACUUGG.....    | 23 | 14     |
| .....GAUAUGUAUGGGUUACUUGGUG.....     | 22 | 115    |
| .....GAUAUGUAUGGGUUACUUGGUGU.....    | 23 | 6      |
| .....AUAUGUAUGGGUUACUUGGUG.....      | 21 | 18     |
| .....GUCAGCGGAUACAUGUUU.....         | 19 | 6      |
| .....GUCAGCGGAUACAUGUUUU.....        | 20 | 12     |
| .....GUCAGCGGAUACAUGUUUUA.....       | 21 | 23     |
| .....GUCAGCGGAUACAUGUUUUUU.....      | 23 | 6      |
| .....UCAGCGGAUACAUGUUU.....          | 18 | 5      |
| .....UCAGCGGAUACAUGUUUU.....         | 19 | 13     |

|                                  |    |      |
|----------------------------------|----|------|
| .....UCAGCGGAUAAACAUUUUUU.....   | 20 | 9    |
| .....UCAGCGGAUAAACAUUUUUU.....   | 21 | 7    |
| .....UCAGCGGAUAAACAUUUUUU.....   | 22 | 7    |
| .....ACAGUGACCAGACAUUCCCU.....   | 22 | 5    |
| .....CCAGUGACCAGACAUUCC.....     | 18 | 17   |
| .....CCAGUGACCAGACAUUCC.....     | 19 | 41   |
| .....CCAGUGACCAGACAUUCCCU.....   | 20 | 266  |
| .....CCAGUGACCAGACAUUCCCU.....   | 21 | 2226 |
| .....CCAGUGACCAGACAUUCCCUA.....  | 22 | 2359 |
| .....CCAGUGACCAGACAUUCCCUAU..... | 23 | 24   |
| .....CAGUGACCAGACAUUCC.....      | 18 | 39   |
| .....CAGUGACCAGACAUUCC.....      | 19 | 129  |
| .....CAGUGACCAGACAUUCCCU.....    | 20 | 4268 |
| .....CAGUGACCAGACAUUCCCUA.....   | 21 | 2118 |
| .....CAGUGACCAGACAUUCCCUAU.....  | 22 | 385  |
| .....AGUGACCAGACAUUCC.....       | 18 | 29   |
| .....AGUGACCAGACAUUCCCU.....     | 19 | 701  |
| .....AGUGACCAGACAUUCCCUA.....    | 20 | 136  |
| .....AGUGACCAGACAUUCCCUAU.....   | 21 | 13   |
| .....GUGACCAGACAUUCCCU.....      | 18 | 5    |
| .....GUGACCAGACAUUCCCUA.....     | 19 | 5    |

antisense match

#sja-mir-1989  
AGAGTTAACGTAACCTTCAGCTGTGTTTCATGTCTTCGACAAAAATAAACCAACAAGTGAATACGTAGGTATTTCATGTTGATTAATATCGAAGAAATGAGCACAACTTAGATTGTTTACTCT  
Total sRNA: 5787 shared 5' end with miRNA: 613 shared 3' end with miRNA: 364  
miRNA

|                                    |    |      |
|------------------------------------|----|------|
| .....UCAGCUGUGUUC AUGUCUUCGA.....  | 22 | 2812 |
| Shared 5' Terminus                 |    |      |
| .....UCAGCUGUGUUC AUGUCU.....      | 18 | 72   |
| .....UCAGCUGUGUUC AUGUCUU.....     | 19 | 83   |
| .....UCAGCUGUGUUC AUGUCUUC.....    | 20 | 46   |
| .....UCAGCUGUGUUC AUGUCUUCG.....   | 21 | 412  |
| Shared 3' Terminus                 |    |      |
| .....AGCUGUGUUC AUGUCUUCGA.....    | 20 | 219  |
| .....CAGCUGUGUUC AUGUCUUCGA.....   | 21 | 116  |
| .....UUCAGCUGUGUUC AUGUCUUCGA..... | 23 | 29   |
| Subsequence                        |    |      |
| .....CAGCUGUGUUC AUGUCUUCG.....    | 20 | 8    |
| .....AGCUGUGUUC AUGUCUUCG.....     | 19 | 16   |
| Others                             |    |      |
| .....UUCAGCUGUGUUC AUGUCUUCG.....  | 22 | 10   |
| .....CAGCUGUGUUC AUGUCUUCGAC.....  | 22 | 132  |
| .....AGCUGUGUUC AUGUCUUCGAC.....   | 21 | 7    |
| .....UCGAAGAAAUGAGCACAACUUA.....   | 22 | 6    |
| .....CGAAGAAAUGAGCACAACUUAG.....   | 22 | 8    |
| .....CGAAGAAAUGAGCACAACUUAGA.....  | 23 | 15   |
| .....GAAGAAAUGAGCACAACUU.....      | 19 | 5    |
| .....GAAGAAAUGAGCACAACUUA.....     | 20 | 16   |
| .....GAAGAAAUGAGCACAACUUAG.....    | 21 | 43   |
| .....GAAGAAAUGAGCACAACUUAGA.....   | 22 | 1579 |
| .....AAGAAAUGAGCACAACUUA.....      | 19 | 12   |
| .....AAGAAAUGAGCACAACUUAG.....     | 20 | 52   |
| .....AAGAAAUGAGCACAACUUAGA.....    | 21 | 60   |

antisense match

#sja-mir-1b  
NNTGGAATGTTGTGAAGTATGTGCNN  
Total sRNA: 1471286 shared 5' end with miRNA: 56390 shared 3' end with miRNA: 2520  
miRNA

|                            |    |         |
|----------------------------|----|---------|
| ..UGGAAUGUUGUGAAGUAUGUC..  | 22 | 1412190 |
| Shared 5' Terminus         |    |         |
| ..UGGAAUGUUGUGAAGUAU.....  | 18 | 643     |
| ..UGGAAUGUUGUGAAGUAUG..... | 19 | 2545    |
| ..UGGAAUGUUGUGAAGUAUGU.... | 20 | 10501   |
| ..UGGAAUGUUGUGAAGUAUGUG... | 21 | 42701   |
| Shared 3' Terminus         |    |         |

```

....AAUGUUGUGAAGUAUGUC..      19      12
...GAAUGUUGUGAAGUAUGUC..      20     328
...GGAAUGUUGUGAAGUAUGUC..      21    2177
Subsequence
...GGAAUGUUGUGAAGUAUG.....      18     35
...GGAAUGUUGUGAAGUAUGU....      19     22
...GGAAUGUUGUGAAGUAUGUG...      20     89
...GAAUGUUGUGAAGUAUGUG...      19     32
....AAUGUUGUGAAGUAUGUG...      18      5
Others
antisense match

```

```

#sja-mir-2162
CTAGGGGATGAGTGGATTGTCATATTTACATTGCTGGTATGTATATGCAACGTTTCACTCTACTCCGGGGA
Total sRNA: 278963      shared 5' end with miRNA: 77313      shared 3' end with miRNA: 733
miRNA

```

```

.....UAUUAUGCAACGUUUCACUCU.....      21    125057
Shared 5' Terminus
.....UAUUAUGCAACGUUUCAC.....      18    1297
.....UAUUAUGCAACGUUUCACU.....      19    41631
.....UAUUAUGCAACGUUUCACUC.....      20    34206
.....UAUUAUGCAACGUUUCACUCUA.....      22     178
Shared 3' Terminus
.....UAUGCAACGUUUCACUCU.....      18     43
.....UUAUGCAACGUUUCACUCU.....      19     75
.....AUUAUGCAACGUUUCACUCU.....      20    606
.....GUAUUUAUGCAACGUUUCACUCU.....      22      6
Subsequence
.....AUUAUGCAACGUUUCACU.....      18    116
.....AUUAUGCAACGUUUCACUC.....      19     99
.....UUAUGCAACGUUUCACUC.....      18      9
Others

```

```

.....AGUGAGAUGUUGCAUAU.....      18     26
.....AGUGAGAUGUUGCAUAUU.....      19     67
.....AGUGAGAUGUUGCAUAUUU.....      20    5327
.....AGUGAGAUGUUGCAUAUUUA.....      21    27610
.....AGUGAGAUGUUGCAUAUUUAC.....      22    3818
.....AGUGAGAUGUUGCAUAUUUACA.....      23    31490
.....AGUGAGAUGUUGCAUAUUUACAU.....      24     174
.....AGUGAGAUGUUGCAUAUUUACAUU.....      25      94
.....GUGAGAUGUUGCAUAUUU.....      19     134
.....GUGAGAUGUUGCAUAUUUA.....      20    2473
.....GUGAGAUGUUGCAUAUUUAC.....      21    2605
.....GUGAGAUGUUGCAUAUUUACA.....      22    1658
.....GUGAGAUGUUGCAUAUUUACAU.....      23      23
.....GUGAGAUGUUGCAUAUUUACAUU.....      24     19
.....UGAGAUGUUGCAUAUUUAC.....      20      7
.....UGAGAUGUUGCAUAUUUACA.....      21     34
.....GAGAUGUUGCAUAUUUAC.....      19      5
.....GAGAUGUUGCAUAUUUACA.....      20     34
.....GAGAUGUUGCAUAUUUACAUU.....      22      9
antisense match

```

```

#sja-mir-219
TCTGTGAACAATCGATTCACTGATTGTCCATTTCGATTCTTGTGTAGAAACATTTTCAATTATTATCATTTATTCAATGATAATGATGATAATATTTAATTCACAAGAGGTGTTAATGGACATCATATGATCGATTATTAATCATCT
Total sRNA: 102776      shared 5' end with miRNA: 44799      shared 3' end with miRNA: 2507
miRNA

```

```

.....UGAUUGUCCAUCGCAUUUCUU.....      22    50730
Shared 5' Terminus
.....UGAUUGUCCAUCGCAUU.....      18     80
.....UGAUUGUCCAUCGCAUUU.....      19    309
.....UGAUUGUCCAUCGCAUUUC.....      20    411
.....UGAUUGUCCAUCGCAUUUCU.....      21    7016
.....UGAUUGUCCAUCGCAUUUCUUG.....      23    36501
.....UGAUUGUCCAUCGCAUUUCUUGU.....      24     464
.....UGAUUGUCCAUCGCAUUUCUUGUU.....      25      18
Shared 3' Terminus

```



|                                    |    |      |
|------------------------------------|----|------|
| .....AUUGUCCAUUCGCAUUUCUU.....     | 20 | 55   |
| .....GAUUGUCCAUUCGCAUUUCUU.....    | 21 | 2441 |
| .....CUGAUUGUCCAUUCGCAUUUCUU.....  | 23 | 8    |
| Subsequence                        |    |      |
| .....GAUUGUCCAUUCGCAUUU.....       | 18 | 7    |
| .....GAUUGUCCAUUCGCAUUUC.....      | 19 | 13   |
| .....GAUUGUCCAUUCGCAUUUCU.....     | 20 | 203  |
| .....AUUGUCCAUUCGCAUUUCU.....      | 19 | 6    |
| Others                             |    |      |
| .....CUGAUUGUCCAUUCGCAUUUCUUG..... | 24 | 11   |
| .....GAUUGUCCAUUCGCAUUUCUUG.....   | 22 | 3038 |
| .....GAUUGUCCAUUCGCAUUUCUUGU.....  | 23 | 55   |
| .....AUUGUCCAUUCGCAUUUCUUG.....    | 21 | 165  |
| .....AUUGUCCAUUCGCAUUUCUUGU.....   | 22 | 115  |
| .....UUGUCCAUUCGCAUUUCUUG.....     | 20 | 16   |
| .....UUGUCCAUUCGCAUUUCUUGU.....    | 21 | 102  |
| .....UUGUCCAUUCGCAUUUCUUGUU.....   | 22 | 18   |
| .....GUCCAUUCGCAUUUCUUG.....       | 18 | 12   |
| .....AAGAGGUGUUAUUGGACAU.....      | 19 | 5    |
| .....AAGAGGUGUUAUUGGACAUCAU.....   | 22 | 40   |
| .....AGAGGUGUUAUUGGACAU.....       | 19 | 5    |
| .....AGAGGUGUUAUUGGACAUCA.....     | 20 | 9    |
| .....AGAGGUGUUAUUGGACAUCAU.....    | 21 | 318  |
| .....AGAGGUGUUAUUGGACAUCAUA.....   | 22 | 573  |
| antisense match                    |    |      |

#sja-mir-277

ATAANNNNNNNNNATATTGTAAATGCATTTTCTGGCCGTAACATAAGACACAATGAACATCCTTATCTTTGATAGTTTTTAAAGTTAAGTTTTGTCTTGTCTTGTCAATGTAATAGATGTCCTTTCTTTTCAGTGATGGG

Total sRNA: 85658 shared 5' end with miRNA: 54014 shared 3' end with miRNA: 396

miRNA

|                                   |    |       |
|-----------------------------------|----|-------|
| .....UAAAUGCAUUUCUGGCCGU.....     | 21 | 28896 |
| Shared 5' Terminus                |    |       |
| .....UAAAUGCAUUUCUGGCC.....       | 18 | 965   |
| .....UAAAUGCAUUUCUGGCC.....       | 19 | 2242  |
| .....UAAAUGCAUUUCUGGCCG.....      | 20 | 2116  |
| .....UAAAUGCAUUUCUGGCCGUA.....    | 22 | 24811 |
| .....UAAAUGCAUUUCUGGCCGUA.....    | 23 | 23471 |
| .....UAAAUGCAUUUCUGGCCGUAAC.....  | 24 | 330   |
| .....UAAAUGCAUUUCUGGCCGUAACU..... | 25 | 75    |
| Shared 3' Terminus                |    |       |
| .....AUGCAUUUCUGGCCGU.....        | 18 | 7     |
| .....AAUGCAUUUCUGGCCGU.....       | 19 | 109   |
| .....AAAUGCAUUUCUGGCCGU.....      | 20 | 279   |
| Subsequence                       |    |       |
| .....AAAUGCAUUUCUGGCC.....        | 18 | 16    |
| .....AAAUGCAUUUCUGGCCG.....       | 19 | 18    |
| .....AAUGCAUUUCUGGCCG.....        | 18 | 13    |
| Others                            |    |       |
| .....AAAUGCAUUUCUGGCCGUA.....     | 21 | 326   |
| .....AAAUGCAUUUCUGGCCGUA.....     | 22 | 535   |
| .....AAAUGCAUUUCUGGCCGUAAC.....   | 23 | 37    |
| .....AAAUGCAUUUCUGGCCGUAACU.....  | 24 | 32    |
| .....AAUGCAUUUCUGGCCGUA.....      | 20 | 213   |
| .....AAUGCAUUUCUGGCCGUA.....      | 21 | 434   |
| .....AAUGCAUUUCUGGCCGUAAC.....    | 22 | 428   |
| .....AAUGCAUUUCUGGCCGUAACU.....   | 23 | 263   |
| .....AUGCAUUUCUGGCCGUA.....       | 19 | 14    |
| .....AUGCAUUUCUGGCCGUA.....       | 20 | 9     |
| .....GCAUUUCUGGCCGUA.....         | 18 | 10    |
| antisense match                   |    |       |

#sja-mir-277b

NNAAAATGCATCATCTACCCTAGANN

Total sRNA: 328649 shared 5' end with miRNA: 119667 shared 3' end with miRNA: 1349

miRNA

..AAAUGCAUCAUCUACCCUAGA.. 22 207027

Shared 5' Terminus

```

..AAAUGCAUCAUCUACCC..... 18 576
..AAAUGCAUCAUCUACCCU.... 19 3094
..AAAUGCAUCAUCUACCCUA... 20 15059
..AAAUGCAUCAUCUACCCUAG... 21 100938
Shared 3' Terminus
.....UGCAUCAUCUACCCUAGA.. 18 20
.....AUGCAUCAUCUACCCUAGA.. 19 75
.....AAUGCAUCAUCUACCCUAGA.. 20 112
.....AAAUGCAUCAUCUACCCUAGA.. 21 1142
Subsequence
...AAAUGCAUCAUCUACCCU.... 18 10
...AAAUGCAUCAUCUACCCUA... 19 60
...AAAUGCAUCAUCUACCCUAG... 20 460
...AAUGCAUCAUCUACCCUA... 18 6
...AAUGCAUCAUCUACCCUAG... 19 43
.....AUGCAUCAUCUACCCUAG... 18 27
Others
antisense match

```

```

#sja-mir-2a
ACCTTTTGCACCGCAGTCAATATTGGCTGATGGCATTGTTTATTGTACACGCCAGTATTGATGAACGGGTAATAGG
Total sRNA: 932498 shared 5' end with miRNA: 72273 shared 3' end with miRNA: 9480
miRNA

```

```

.....UCACAGCCAGUAUUGAUGAACG..... 22 850364
Shared 5' Terminus
.....UCACAGCCAGUAUUGAUG..... 18 2359
.....UCACAGCCAGUAUUGAUGA..... 19 6905
.....UCACAGCCAGUAUUGAUGAA..... 20 24093
.....UCACAGCCAGUAUUGAUGAAC..... 21 38862
.....UCACAGCCAGUAUUGAUGAACGG..... 23 40
.....UCACAGCCAGUAUUGAUGAACGGG..... 25 8
Shared 3' Terminus
.....AGCCAGUAUUGAUGAACG..... 18 20
.....CAGCCAGUAUUGAUGAACG..... 19 20
.....ACAGCCAGUAUUGAUGAACG..... 20 7479
.....CACAGCCAGUAUUGAUGAACG..... 21 1960
Subsequence
.....CACAGCCAGUAUUGAUGA..... 18 15
.....CACAGCCAGUAUUGAUGAA..... 19 64
.....CACAGCCAGUAUUGAUGAAC..... 20 66
.....ACAGCCAGUAUUGAUGAA..... 18 44
.....ACAGCCAGUAUUGAUGAAC..... 19 105
Others
.....CAGUCAAUAUUGGCUGAUGGCA..... 22 44
.....CAGUCAAUAUUGGCUGAUGGCAU..... 23 5
.....AGUCAAUAUUGGCUGAUGGCA..... 21 10
.....AGUCAAUAUUGGCUGAUGGCAU..... 22 7
.....GUCACAGCCAGUAUUGAUGAAC..... 22 7
antisense match

```

```

#sja-mir-2b
AGGTGGTGGCGTCTCAAAGGACTGTGAGCCAACGTAATTACTGTATCACAGCCCTGCTTGGGACACAGCCTACCTGC
Total sRNA: 16860 shared 5' end with miRNA: 10920 shared 3' end with miRNA: 50
miRNA

```

```

.....UAUCACAGCCUGCUUGGGACAC..... 23 5629
Shared 5' Terminus
.....UAUCACAGCCUGCUUGG..... 18 102
.....UAUCACAGCCUGCUUGGG..... 19 209
.....UAUCACAGCCUGCUUGGGA..... 20 448
.....UAUCACAGCCUGCUUGGGAC..... 21 1043
.....UAUCACAGCCUGCUUGGGACA..... 22 5295
.....UAUCACAGCCUGCUUGGGACACA..... 24 3822
Shared 3' Terminus
.....ACAGCCUGCUUGGGACAC..... 19 30
.....AUCACAGCCUGCUUGGGACAC..... 22 16
Subsequence
.....AUCACAGCCUGCUUGGGACA..... 21 8

```

|                                    |    |    |
|------------------------------------|----|----|
| .....ACAGCCUGCUUGGGACA.....        | 18 | 11 |
| Others                             |    |    |
| .....CGUCUCAAAAGGACUGUGAG.....     | 19 | 6  |
| .....CGUCUCAAAAGGACUGUGAGC.....    | 20 | 9  |
| .....CGUCUCAAAAGGACUGUGAGCC.....   | 21 | 19 |
| .....CGUCUCAAAAGGACUGUGAGCCA.....  | 22 | 92 |
| .....GUCUCAAAAGGACUGUGAGCC.....    | 20 | 10 |
| .....GUCUCAAAAGGACUGUGAGCCA.....   | 21 | 20 |
| .....GUCUCAAAAGGACUGUGAGCCAAC..... | 23 | 5  |
| .....AUCACAGCCUGCUUGGGACACA.....   | 23 | 21 |
| .....ACAGCCUGCUUGGGACACA.....      | 20 | 41 |
| antisense match                    |    |    |

#sja-mir-2c  
TTCAGGCGCAACCCCTTGTTCGACTGTGATGTGATTGAAATTAGCCCATATCACAGCCGTGCTTAAGGGCTTCGTCGAAA  
Total sRNA: 6498 shared 5' end with miRNA: 944 shared 3' end with miRNA: 23  
miRNA

|                                    |    |      |
|------------------------------------|----|------|
| .....ACCCUUGUUCGACUGUGAUGUG.....   | 22 | 4523 |
| Shared 5' Terminus                 |    |      |
| .....ACCCUUGUUCGACUGUGAU.....      | 19 | 6    |
| .....ACCCUUGUUCGACUGUGAUG.....     | 20 | 23   |
| .....ACCCUUGUUCGACUGUGAUGU.....    | 21 | 899  |
| .....ACCCUUGUUCGACUGUGAUGUGA.....  | 23 | 11   |
| Shared 3' Terminus                 |    |      |
| .....CCUUGUUCGACUGUGAUGUG.....     | 20 | 6    |
| .....CCUUGUUCGACUGUGAUGUG.....     | 21 | 14   |
| Subsequence                        |    |      |
| Others                             |    |      |
| .....UAUCACAGCCGUGCUUAAG.....      | 19 | 24   |
| .....UAUCACAGCCGUGCUUAAGG.....     | 20 | 175  |
| .....UAUCACAGCCGUGCUUAAGGG.....    | 21 | 126  |
| .....UAUCACAGCCGUGCUUAAGGGC.....   | 22 | 204  |
| .....UAUCACAGCCGUGCUUAAGGGCU.....  | 23 | 240  |
| .....UAUCACAGCCGUGCUUAAGGGCUU..... | 24 | 206  |
| .....AUCACAGCCGUGCUUAAGGGCUU.....  | 23 | 6    |
| antisense match                    |    |      |

#sja-mir-2d  
CGACCAGTTCGTATCCATGGATTGTGATTTTCGGACTCCATGTTTCATTAAGTGAATATCACAGTCTGCTTAGGTGACGAATTCGT  
Total sRNA: 45601 shared 5' end with miRNA: 20296 shared 3' end with miRNA: 221  
miRNA

|                                       |    |       |
|---------------------------------------|----|-------|
| .....UAUCACAGUCCUGCUUAGGUGACG.....    | 24 | 24427 |
| Shared 5' Terminus                    |    |       |
| .....UAUCACAGUCCUGCUUAG.....          | 18 | 10    |
| .....UAUCACAGUCCUGCUUAGG.....         | 19 | 50    |
| .....UAUCACAGUCCUGCUUAGGU.....        | 20 | 147   |
| .....UAUCACAGUCCUGCUUAGGUG.....       | 21 | 141   |
| .....UAUCACAGUCCUGCUUAGGUGA.....      | 22 | 3505  |
| .....UAUCACAGUCCUGCUUAGGUGAC.....     | 23 | 5292  |
| .....UAUCACAGUCCUGCUUAGGUGACGA.....   | 25 | 10898 |
| .....UAUCACAGUCCUGCUUAGGUGACGAA.....  | 26 | 243   |
| .....UAUCACAGUCCUGCUUAGGUGACGAAU..... | 27 | 8     |
| Shared 3' Terminus                    |    |       |
| .....ACAGUCCUGCUUAGGUGACG.....        | 20 | 19    |
| .....UCACAGUCCUGCUUAGGUGACG.....      | 22 | 7     |
| .....AUCACAGUCCUGCUUAGGUGACG.....     | 23 | 42    |
| .....AUUACACAGUCCUGCUUAGGUGACG.....   | 25 | 153   |
| Subsequence                           |    |       |
| .....AUCACAGUCCUGCUUAGGUGA.....       | 21 | 6     |
| .....AUCACAGUCCUGCUUAGGUGAC.....      | 22 | 10    |
| Others                                |    |       |
| .....GUCAUCCAUGGAUUGUGAUUU.....       | 21 | 17    |
| .....GUCAUCCAUGGAUUGUGAUUUU.....      | 22 | 287   |
| .....CAUCCAUGGAUUGUGAUUUU.....        | 20 | 9     |
| .....CGGACUCCAUGUUUCAUUAA.....        | 20 | 5     |
| .....CGGACUCCAUGUUUCAUUAG.....        | 21 | 6     |
| .....CGGACUCCAUGUUUCAUUAGU.....       | 22 | 33    |

|                                      |    |    |
|--------------------------------------|----|----|
| .....CGGACUCCAUGUUUCAUUAAAGUG.....   | 23 | 7  |
| .....CGGACUCCAUGUUUCAUUAAAGUGA.....  | 24 | 33 |
| .....CGGACUCCAUGUUUCAUUAAAGUGAA..... | 25 | 34 |
| .....AUAUCACAGUCCUGCUUAGGU.....      | 21 | 10 |
| .....AUAUCACAGUCCUGCUUAGGUG.....     | 22 | 10 |
| .....AUAUCACAGUCCUGCUUAGGUGA.....    | 23 | 40 |
| .....AUAUCACAGUCCUGCUUAGGUGAC.....   | 24 | 42 |
| .....AUAUCACAGUCCUGCUUAGGUGACGA..... | 26 | 47 |
| .....AUCACAGUCCUGCUUAGGUGACGA.....   | 24 | 23 |
| .....ACAGUCCUGCUUAGGUGACGA.....      | 21 | 9  |

antisense match

#sja-mir-2e

CCACCGCTCTTACCAACTTAGACTGAGTTATACTGCTACTGTAAGCTTTGTATATCACAGTCCAAGCTTTGGTAAGTTTGTAT

Total sRNA: 16624 shared 5' end with miRNA: 5958 shared 3' end with miRNA: 22

miRNA

|                                     |    |      |
|-------------------------------------|----|------|
| .....UAUCACAGUCCAAGCUUUGGU.....     | 21 | 5987 |
| Shared 5' Terminus                  |    |      |
| .....UAUCACAGUCCAAGCUUU.....        | 18 | 720  |
| .....UAUCACAGUCCAAGCUUUG.....       | 19 | 182  |
| .....UAUCACAGUCCAAGCUUUGG.....      | 20 | 1001 |
| .....UAUCACAGUCCAAGCUUUGGUA.....    | 22 | 786  |
| .....UAUCACAGUCCAAGCUUUGGUA.....    | 23 | 2686 |
| .....UAUCACAGUCCAAGCUUUGGUAAG.....  | 24 | 560  |
| .....UAUCACAGUCCAAGCUUUGGUAAGU..... | 25 | 23   |
| Shared 3' Terminus                  |    |      |
| .....AUCACAGUCCAAGCUUUGGU.....      | 20 | 17   |

Subsequence

|                                   |    |      |
|-----------------------------------|----|------|
| Others                            |    |      |
| .....UACCAACUUAGACUGAGUUA.....    | 20 | 56   |
| .....UACCAACUUAGACUGAGUUAU.....   | 21 | 3524 |
| .....UACCAACUUAGACUGAGUUAUA.....  | 22 | 596  |
| .....ACCAACUUAGACUGAGUUA.....     | 19 | 11   |
| .....ACCAACUUAGACUGAGUUAU.....    | 20 | 53   |
| .....ACCAACUUAGACUGAGUUAUA.....   | 21 | 85   |
| .....CCAACUUAGACUGAGUUAU.....     | 19 | 5    |
| .....CUGCUCUGUAAGCUUUGUA.....     | 20 | 10   |
| .....AUAUCACAGUCCAAGCUUUGGUA..... | 24 | 5    |
| .....AUCACAGUCCAAGCUUUGGUA.....   | 21 | 49   |
| .....AUCACAGUCCAAGCUUUGGUA.....   | 22 | 144  |
| .....AUCACAGUCCAAGCUUUGGUAAG..... | 23 | 19   |
| .....UCACAGUCCAAGCUUUGGUA.....    | 21 | 12   |
| .....UCACAGUCCAAGCUUUGGUAAGU..... | 23 | 9    |
| .....ACAGUCCAAGCUUUGGUA.....      | 18 | 7    |
| .....ACAGUCCAAGCUUUGGUA.....      | 19 | 16   |

antisense match

#sja-mir-307

AGAAACTCCTCATAAAGAAGGTTGTTTTGATGTAATATCAATAATTAATAATAATTATTATTATTATTCATTCGATGAAATAATAATATAAAGAAGATGAATATAAAATAACTTACATCACAACTACTTGATTGAGGGGCACTTCG

Total sRNA: 2800 shared 5' end with miRNA: 221 shared 3' end with miRNA: 64

miRNA

|                                    |    |     |
|------------------------------------|----|-----|
| .....CCUCAAAAAGAAGGUUUUGAUG.....   | 24 | 757 |
| Shared 5' Terminus                 |    |     |
| .....CCUCAAAAAGAAGGUUUUG.....      | 21 | 7   |
| .....CCUCAAAAAGAAGGUUUUGA.....     | 22 | 43  |
| .....CCUCAAAAAGAAGGUUUUGAU.....    | 23 | 40  |
| .....CCUCAAAAAGAAGGUUUUGAUGU.....  | 25 | 119 |
| .....CCUCAAAAAGAAGGUUUUGAUGUA..... | 26 | 10  |
| Shared 3' Terminus                 |    |     |
| .....AUAAGAAGGUUUUGAUG.....        | 20 | 10  |
| .....UCAAAAAGAAGGUUUUGAUG.....     | 22 | 15  |
| .....CUCAAAAAGAAGGUUUUGAUG.....    | 23 | 27  |
| .....UCCUCAAAAAGAAGGUUUUGAUG.....  | 25 | 8   |
| Subsequence                        |    |     |
| .....CUCAAAAAGAAGGUUUUGA.....      | 21 | 13  |
| .....CUCAAAAAGAAGGUUUUGAU.....     | 22 | 11  |
| .....UCAAAAAGAAGGUUUUGAU.....      | 21 | 6   |

|                                   |    |     |  |
|-----------------------------------|----|-----|--|
| Others                            |    |     |  |
| .....CUCAUAAAGAAGGUUUUGAUGU.....  | 24 | 9   |  |
| .....AUCACAACCUACUUGAUUGA.....    | 20 | 8   |  |
| .....AUCACAACCUACUUGAUUGAG.....   | 21 | 11  |  |
| .....AUCACAACCUACUUGAUUGAGGG..... | 24 | 12  |  |
| .....UCACAACCUACUUGAUUG.....      | 18 | 9   |  |
| .....UCACAACCUACUUGAUUGA.....     | 19 | 212 |  |
| .....UCACAACCUACUUGAUUGAG.....    | 20 | 273 |  |
| .....UCACAACCUACUUGAUUGAGG.....   | 21 | 189 |  |
| .....UCACAACCUACUUGAUUGAGGG.....  | 22 | 214 |  |
| .....UCACAACCUACUUGAUUGAGGGG..... | 23 | 616 |  |
| .....CACAACCUACUUGAUUGAGGGG.....  | 22 | 6   |  |
| .....ACAACCUACUUGAUUGAG.....      | 18 | 11  |  |
| .....ACAACCUACUUGAUUGAGG.....     | 19 | 17  |  |
| .....ACAACCUACUUGAUUGAGGG.....    | 20 | 15  |  |
| .....ACAACCUACUUGAUUGAGGGG.....   | 21 | 89  |  |
| antisense match                   |    |     |  |

#sja-mir-31

TATTTGTTGTTGGCAAGATTACGGCGAAGCTGAATCAAATTTAAAAATGTTTCAGCTTCACTTTATTTTGCCAATAAAGGTAGC

Total sRNA: 2133 shared 5' end with miRNA: 1104 shared 3' end with miRNA: 9

|                                    |    |     |  |
|------------------------------------|----|-----|--|
| miRNA                              |    |     |  |
| .....UGGCAAGAUUACGGCGAAGCU.....    | 21 | 993 |  |
| Shared 5' Terminus                 |    |     |  |
| .....UGGCAAGAUUACGGCGAAG.....      | 19 | 129 |  |
| .....UGGCAAGAUUACGGCGAAGC.....     | 20 | 130 |  |
| .....UGGCAAGAUUACGGCGAAGCUG.....   | 22 | 172 |  |
| .....UGGCAAGAUUACGGCGAAGCUGA.....  | 23 | 618 |  |
| .....UGGCAAGAUUACGGCGAAGCUGAA..... | 24 | 48  |  |
| Shared 3' Terminus                 |    |     |  |
| .....GGCAAGAUUACGGCGAAGCU.....     | 20 | 7   |  |
| Subsequence                        |    |     |  |
| Others                             |    |     |  |
| .....GGCAAGAUUACGGCGAAGCUGAA.....  | 23 | 11  |  |
| .....AGCUUCACUUUUUUUGCCA.....      | 22 | 6   |  |
| antisense match                    |    |     |  |

#sja-mir-3479

CATGTTTGTGAGGTGGATGTTAGTGCAATTTAGTGACGTAATATATATGCACTTACCTTCGCCTTGCAAAATATAGG

Total sRNA: 47531 shared 5' end with miRNA: 7136 shared 3' end with miRNA: 187

|                                   |    |       |  |
|-----------------------------------|----|-------|--|
| miRNA                             |    |       |  |
| .....UAUUGCACUUACCUUCGCCUUG.....  | 22 | 32829 |  |
| Shared 5' Terminus                |    |       |  |
| .....UAUUGCACUUACCUUCGC.....      | 18 | 216   |  |
| .....UAUUGCACUUACCUUCGCC.....     | 19 | 870   |  |
| .....UAUUGCACUUACCUUCGCCU.....    | 20 | 1196  |  |
| .....UAUUGCACUUACCUUCGCCUU.....   | 21 | 4787  |  |
| .....UAUUGCACUUACCUUCGCCUUGC..... | 23 | 67    |  |
| Shared 3' Terminus                |    |       |  |
| .....UUGCACUUACCUUCGCCUUG.....    | 20 | 41    |  |
| .....AUUGCACUUACCUUCGCCUUG.....   | 21 | 104   |  |
| .....AUUGCACUUACCUUCGCCUUG.....   | 23 | 33    |  |
| Subsequence                       |    |       |  |
| .....AUUGCACUUACCUUCGCC.....      | 18 | 5     |  |
| .....AUUGCACUUACCUUCGCCUU.....    | 20 | 25    |  |
| .....UUGCACUUACCUUCGCCUU.....     | 19 | 7     |  |
| Others                            |    |       |  |
| .....UUGUGAGGUGGAUGUUAGUGCA.....  | 22 | 10    |  |
| .....UGAGGUGGAUGUUAGUGCAAUU.....  | 22 | 97    |  |
| .....UGAGGUGGAUGUUAGUGCAAUU.....  | 23 | 8     |  |
| .....GAGGUGGAUGUUAGUGCAAU.....    | 20 | 11    |  |
| .....GAGGUGGAUGUUAGUGCAAUU.....   | 21 | 70    |  |
| .....GAGGUGGAUGUUAGUGCAAUU.....   | 22 | 369   |  |
| .....AGGUGGAUGUUAGUGCAA.....      | 18 | 9     |  |
| .....AGGUGGAUGUUAGUGCAA.....      | 19 | 22    |  |
| .....AGGUGGAUGUUAGUGCAAUU.....    | 20 | 267   |  |
| .....AGGUGGAUGUUAGUGCAAUU.....    | 21 | 1336  |  |

```

.....AGGUGGAUGUUAGUGCAAUUUA..... 22 4674
.....GGUGGAUGUUAGUGCAAUUU..... 20 15
.....GGUGGAUGUUAGUGCAAUUUA..... 21 214
.....GUGGAUGUUAGUGCAAUUUA..... 20 98
.....AUUGCACUUACCUUCGCCUUGC..... 22 80
.....UUGCACUUACCUUCGCCUUGC..... 21 9
.....UGCACUUACCUUCGCCUUGC..... 20 5
antisense match

```

#sja-mir-3488

TGGTGAATGACGATTGATGATTATAATGGCGCGCACGTGCTCCGGTAGCTTAGTTGGTTAGAGCGCCG  
Total sRNA: 2104 shared 5' end with miRNA: 1142 shared 3' end with miRNA: 29  
miRNA

```

.....GCUCCGGUAGCUUAGUUGGU..... 20 653
Shared 5' Terminus
.....GCUCCGGUAGCUUAGUUG..... 18 73
.....GCUCCGGUAGCUUAGUUG..... 19 186
.....GCUCCGGUAGCUUAGUUGGU..... 21 279
.....GCUCCGGUAGCUUAGUUGGUUA..... 22 358
.....GCUCCGGUAGCUUAGUUGGUUAG..... 23 173
.....GCUCCGGUAGCUUAGUUGGUUAGA..... 24 41
.....GCUCCGGUAGCUUAGUUGGUUAGAG..... 25 25
.....GCUCCGGUAGCUUAGUUGGUUAGAGC..... 26 6
Shared 3' Terminus
.....UCCGGUAGCUUAGUUGGU..... 18 5
.....GUGCUCGGUAGCUUAGUUGGU..... 22 22
Subsequence
Others
.....GUGCUCGGUAGCUUAGU..... 18 7
.....GUGCUCGGUAGCUUAGUUG..... 20 17
.....GUGCUCGGUAGCUUAGUUG..... 21 49
.....GUGCUCGGUAGCUUAGUUGGU..... 23 39
.....GUGCUCGGUAGCUUAGUUGGUUA..... 24 42
.....GUGCUCGGUAGCUUAGUUGGUUAG..... 25 10
.....UGCUCGGUAGCUUAGUUGGU..... 22 5
.....UCCGGUAGCUUAGUUGGU..... 19 36
.....UCCGGUAGCUUAGUUGGUUA..... 20 12
.....UCCGGUAGCUUAGUUGGUUAG..... 21 14
.....CCGGUAGCUUAGUUGGUUAG..... 20 5
.....CGGUAGCUUAGUUGGUUAG..... 19 5
antisense match

```

#sja-mir-3505

TGCGCAAGTGTGACTGTCTGGACACAGTAGTTTGGCGGTAACGCTGTGGCGTTTGACACGAAACAGACTGAGTTCCAACCGTAG  
Total sRNA: 4354 shared 5' end with miRNA: 2132 shared 3' end with miRNA: 127  
miRNA

```

.....UGACUGUCUGGACACAGUAGUU..... 23 1903
Shared 5' Terminus
.....UGACUGUCUGGACACAGUAG..... 20 906
.....UGACUGUCUGGACACAGUAGU..... 21 350
.....UGACUGUCUGGACACAGUAGUU..... 22 873
Shared 3' Terminus
.....GACUGUCUGGACACAGUAGUU..... 22 40
.....GUGACUGUCUGGACACAGUAGUU..... 24 87
Subsequence
.....GACUGUCUGGACACAGUAG..... 19 72
.....GACUGUCUGGACACAGUAGU..... 20 13
.....GACUGUCUGGACACAGUAGUU..... 21 5
Others
.....CAAGUGUGACUGUCUGGACA..... 20 15
.....AAGUGUGACUGUCUGGACAC..... 20 8
.....AGUGUGACUGUCUGGACACA..... 20 11
.....GUGUGACUGUCUGGACACAG..... 20 12
.....UGUGACUGUCUGGACACAGUAG..... 22 7
.....GUGACUGUCUGGACACAGUA..... 20 11
.....GUGACUGUCUGGACACAGUAG..... 21 12
.....GUGACUGUCUGGACACAGUAGU..... 23 9

```

antisense match

#sja-mir-36

TATAGCTTGC GAAGAATGCCGATCCGGTCAGCCATTCAACAATCTATCAGTAATAAACGGCCACCGGTAGACATTCATTGCAAGATATTAT

Total sRNA: 115809 shared 5' end with miRNA: 34241 shared 3' end with miRNA: 976

|                                      |                                  |       |       |
|--------------------------------------|----------------------------------|-------|-------|
| miRNA                                | .....CCACCGGUAGACAUUC AUUCG..... | 23    | 79783 |
| Shared 5' Terminus                   | .....CCACCGGUAGACAUUC A.....     | 18    | 114   |
| .....CCACCGGUAGACAUUC A.....         | 19                               | 1331  |       |
| .....CCACCGGUAGACAUUC AU.....        | 20                               | 1280  |       |
| .....CCACCGGUAGACAUUC AUUC.....      | 21                               | 5497  |       |
| .....CCACCGGUAGACAUUC AUUCG.....     | 22                               | 15942 |       |
| .....CCACCGGUAGACAUUC AUUCGCA.....   | 24                               | 9479  |       |
| .....CCACCGGUAGACAUUC AUUCGCAA.....  | 25                               | 596   |       |
| Shared 3' Terminus                   | .....GGGUAGACAUUC AUUCG.....     | 18    | 108   |
| .....CCGGUAGACAUUC AUUCG.....        | 20                               | 10    |       |
| .....ACCGGUAGACAUUC AUUCG.....       | 21                               | 108   |       |
| .....CACCGGUAGACAUUC AUUCG.....      | 22                               | 748   |       |
| Subsequence                          | .....CACCGGUAGACAUUC A.....      | 18    | 9     |
| .....CACCGGUAGACAUUC AUUC.....       | 20                               | 33    |       |
| .....CACCGGUAGACAUUC AUUCG.....      | 21                               | 148   |       |
| .....ACCGGUAGACAUUC AUUCG.....       | 20                               | 26    |       |
| Others                               | .....GAAGAAUGCCGAUCCGGUCA.....   | 20    | 8     |
| .....GAAGAAUGCCGAUCCGGUCAG.....      | 21                               | 5     |       |
| .....GAAGAAUGCCGAUCCGGUCAGC.....     | 22                               | 25    |       |
| .....GAAGAAUGCCGAUCCGGUCAGCC.....    | 23                               | 275   |       |
| .....AAGAAUGCCGAUCCGGUCAGCC.....     | 22                               | 19    |       |
| .....AUUCAACAUCUAUCAGUAUAAAACGG..... | 27                               | 13    |       |
| .....AACAAUCUAUCAGUAUAAAACGG.....    | 23                               | 6     |       |
| .....CACCGGUAGACAUUC AUUCGCA.....    | 23                               | 160   |       |
| .....CACCGGUAGACAUUC AUUCGCAA.....   | 24                               | 18    |       |
| .....ACCGGUAGACAUUC AUUCGCA.....     | 22                               | 15    |       |
| .....GGGUAGACAUUC AUUCGCA.....       | 19                               | 6     |       |

antisense match

#sja-mir-61

CATTCTAAC TTTACATCACATGACTAGAAAGTGCACCTCACTCCATCTCAGTACAGACATCATT TAGAGAAATGTGCCACAGTAAAAATCCCTATGTTACGTA AATTTGCGTAAGTTCAATGTGTATTGTAGATTTATTA

Total sRNA: 47544 shared 5' end with miRNA: 21747 shared 3' end with miRNA: 147

|                                     |                                    |       |       |
|-------------------------------------|------------------------------------|-------|-------|
| miRNA                               | .....UGACUAGAAAAGUGCACUCACUUC..... | 23    | 25522 |
| Shared 5' Terminus                  | .....UGACUAGAAAAGUGCACUC.....      | 18    | 30    |
| .....UGACUAGAAAAGUGCACUCA.....      | 19                                 | 99    |       |
| .....UGACUAGAAAAGUGCACUCAC.....     | 20                                 | 270   |       |
| .....UGACUAGAAAAGUGCACUCACU.....    | 21                                 | 4638  |       |
| .....UGACUAGAAAAGUGCACUCACUU.....   | 22                                 | 16667 |       |
| .....UGACUAGAAAAGUGCACUCACUUC.....  | 24                                 | 43    |       |
| Shared 3' Terminus                  | .....ACUAGAAAAGUGCACUCACUUC.....   | 21    | 18    |
| .....GACUAGAAAAGUGCACUCACUUC.....   | 22                                 | 115   |       |
| .....AUGACUAGAAAAGUGCACUCACUUC..... | 24                                 | 6     |       |
| Subsequence                         | .....GACUAGAAAAGUGCACUCACU.....    | 20    | 13    |
| .....GACUAGAAAAGUGCACUCACUU.....    | 21                                 | 43    |       |
| .....ACUAGAAAAGUGCACUCACUU.....     | 20                                 | 12    |       |

Others

|                                    |    |    |
|------------------------------------|----|----|
| .....UCACAUGACUAGAAAAGUGCACU.....  | 22 | 36 |
| .....UCACAUGACUAGAAAAGUGCACUC..... | 23 | 9  |

antisense match

#sja-mir-7

ATGTTGCCGTTGCTTAATCATGGAAGACTGGTGATATGTTGTTGATTGATGAAAGTTTAAAGTATTTTCATAATTTAAAGCTTCATCAAAAACATGATATTACGAACAACCTTATCGCATTTCCATGTATGCAATAGGTTGAACTTC

Total sRNA: 1449744 shared 5' end with miRNA: 170273 shared 3' end with miRNA: 5639

|                    |                           |    |         |
|--------------------|---------------------------|----|---------|
| miRNA              | UGGAAGACUGGUGUAUGUUGUU    | 23 | 1271095 |
| Shared 5' Terminus |                           |    |         |
|                    | UGGAAGACUGGUGUAUG         | 18 | 677     |
|                    | UGGAAGACUGGUGUAUGU        | 19 | 2134    |
|                    | UGGAAGACUGGUGUAUGUU       | 20 | 5361    |
|                    | UGGAAGACUGGUGUAUGUUG      | 21 | 9842    |
|                    | UGGAAGACUGGUGUAUGUUGU     | 22 | 152128  |
|                    | UGGAAGACUGGUGUAUGUUGUU    | 24 | 130     |
| Shared 3' Terminus |                           |    |         |
|                    | AGACUGGUGUAUGUUGUU        | 19 | 8       |
|                    | AAGACUGGUGUAUGUUGUU       | 20 | 45      |
|                    | GAAGACUGGUGUAUGUUGUU      | 21 | 453     |
|                    | GGAAGACUGGUGUAUGUUGUU     | 22 | 5044    |
|                    | AUGGAAGACUGGUGUAUGUUGUU   | 24 | 79      |
|                    | CAUGGAAGACUGGUGUAUGUUGUU  | 25 | 5       |
|                    | UCAUGGAAGACUGGUGUAUGUUGUU | 26 | 5       |
| Subsequence        |                           |    |         |
|                    | GGAAGACUGGUGUAUGU         | 18 | 9       |
|                    | GGAAGACUGGUGUAUGUU        | 19 | 13      |
|                    | GGAAGACUGGUGUAUGUUG       | 20 | 24      |
|                    | GGAAGACUGGUGUAUGUUGU      | 21 | 587     |
|                    | GAAGACUGGUGUAUGUUGU       | 20 | 24      |
| Others             |                           |    |         |
|                    | UCAUGGAAGACUGGUGUAUGU     | 22 | 24      |
|                    | UCAUGGAAGACUGGUGUAUGUU    | 23 | 134     |
|                    | UCAUGGAAGACUGGUGUAUGUUG   | 24 | 7       |
|                    | UCAUGGAAGACUGGUGUAUGUUGU  | 25 | 12      |
|                    | CAUGGAAGACUGGUGUAUGUU     | 22 | 5       |
|                    | CAUGGAAGACUGGUGUAUGUUG    | 23 | 5       |
|                    | CAUGGAAGACUGGUGUAUGUUGU   | 24 | 7       |
|                    | AUGGAAGACUGGUGUAUGUU      | 21 | 18      |
|                    | AUGGAAGACUGGUGUAUGUUG     | 22 | 46      |
|                    | AUGGAAGACUGGUGUAUGUUGU    | 23 | 221     |
|                    | CAACUUUUCGCAUUCUCCA       | 20 | 40      |
|                    | CAACUUUUCGCAUUCUCCA       | 21 | 153     |
|                    | CAACUUUUCGCAUUCUCCAUG     | 22 | 795     |
|                    | CAACUUUUCGCAUUCUCCAUGU    | 23 | 20      |
|                    | AACUUUUCGCAUUCUCCA        | 19 | 13      |
|                    | AACUUUUCGCAUUCUCCA        | 20 | 130     |
|                    | AACUUUUCGCAUUCUCCAUG      | 21 | 354     |
|                    | AACUUUUCGCAUUCUCCAUGU     | 22 | 56      |
|                    | ACUUUUCGCAUUCUCCAUG       | 20 | 6       |
|                    | ACUUUUCGCAUUCUCCAUGU      | 21 | 6       |
| antisense match    |                           |    |         |

#sja-mir-71a

GTGATAC TAGTGTGTAAAGACGATGGTAGTGAGATGCCAGTTGCATCTCGCTTCCCGCCTTCCCGGTAAGAATCAC

Total sRNA: 7459724 shared 5' end with miRNA: 3604013 shared 3' end with miRNA: 9664

|                    |                          |    |         |
|--------------------|--------------------------|----|---------|
| miRNA              | UGAAAGACGAUGGUAGUGAGAUG  | 23 | 3835922 |
| Shared 5' Terminus |                          |    |         |
|                    | UGAAAGACGAUGGUAGUG       | 18 | 9314    |
|                    | UGAAAGACGAUGGUAGUGA      | 19 | 71230   |
|                    | UGAAAGACGAUGGUAGUGAG     | 20 | 368417  |
|                    | UGAAAGACGAUGGUAGUGAGA    | 21 | 615498  |
|                    | UGAAAGACGAUGGUAGUGAGAU   | 22 | 2525837 |
|                    | UGAAAGACGAUGGUAGUGAGAGC  | 24 | 13700   |
|                    | UGAAAGACGAUGGUAGUGAGAGCC | 25 | 16      |
| Shared 3' Terminus |                          |    |         |
|                    | GACGAUGGUAGUGAGAUG       | 18 | 72      |
|                    | AGACGAUGGUAGUGAGAUG      | 19 | 124     |
|                    | AAGACGAUGGUAGUGAGAUG     | 20 | 332     |
|                    | AAAGACGAUGGUAGUGAGAUG    | 21 | 2148    |
|                    | GAAAGACGAUGGUAGUGAGAUG   | 22 | 6986    |
| Subsequence        |                          |    |         |
|                    | GAAAGACGAUGGUAGUGA       | 18 | 97      |



|                                   |    |      |
|-----------------------------------|----|------|
| .....GAAAGACGAUGGUAGUGAG.....     | 19 | 503  |
| .....GAAAGACGAUGGUAGUGAGA.....    | 20 | 1295 |
| .....GAAAGACGAUGGUAGUGAGAU.....   | 21 | 6124 |
| .....AAAGACGAUGGUAGUGAG.....      | 18 | 54   |
| .....AAAGACGAUGGUAGUGAGA.....     | 19 | 217  |
| .....AAAGACGAUGGUAGUGAGAU.....    | 20 | 953  |
| .....AAGACGAUGGUAGUGAGA.....      | 18 | 20   |
| .....AAGACGAUGGUAGUGAGAU.....     | 19 | 85   |
| .....AGACGAUGGUAGUGAGAU.....      | 18 | 45   |
| Others                            |    |      |
| .....UGUGAAAGACGAUGGUAGUGA.....   | 21 | 10   |
| .....UGUGAAAGACGAUGGUAGUGAG.....  | 22 | 40   |
| .....UGUGAAAGACGAUGGUAGUGAGA..... | 23 | 165  |
| .....GUGAAAGACGAUGGUAGUGA.....    | 20 | 36   |
| .....GUGAAAGACGAUGGUAGUGAG.....   | 21 | 36   |
| .....GUGAAAGACGAUGGUAGUGAGA.....  | 22 | 10   |
| .....GUGAAAGACGAUGGUAGUGAGAU..... | 23 | 362  |
| .....GAAAGACGAUGGUAGUGAGAUGC..... | 23 | 16   |
| .....AAAGACGAUGGUAGUGAGAUGC.....  | 22 | 12   |
| .....AAGACGAUGGUAGUGAGAUGC.....   | 21 | 17   |
| .....UCUCGCUUCCCGCCUUCCCG.....    | 22 | 10   |
| antisense match                   |    |      |

#sja-mir-71b  
CCGTTTGCTGTGAAAGACTTGAGTAGTGAGACGCTTATAGCGTTGTTGTCTGCGGTTTCGGCGCTCATACTAAGTCTTCCCGGCTCACTGGC  
Total sRNA: 3652004 shared 5' end with miRNA: 451969 shared 3' end with miRNA: 22975  
miRNA

|                                        |    |         |
|----------------------------------------|----|---------|
| .....UGAAAGACUUGAGUAGUGAGACG.....      | 23 | 3063247 |
| Shared 5' Terminus                     |    |         |
| .....UGAAAGACUUGAGUAGUG.....           | 18 | 66      |
| .....UGAAAGACUUGAGUAGUGA.....          | 19 | 1312    |
| .....UGAAAGACUUGAGUAGUGAG.....         | 20 | 24113   |
| .....UGAAAGACUUGAGUAGUGAGA.....        | 21 | 86355   |
| .....UGAAAGACUUGAGUAGUGAGAC.....       | 22 | 134083  |
| .....UGAAAGACUUGAGUAGUGAGACGC.....     | 24 | 161464  |
| .....UGAAAGACUUGAGUAGUGAGACGCU.....    | 25 | 40777   |
| .....UGAAAGACUUGAGUAGUGAGACGCUU.....   | 26 | 3743    |
| .....UGAAAGACUUGAGUAGUGAGACGCUUA.....  | 27 | 47      |
| .....UGAAAGACUUGAGUAGUGAGACGCUUAU..... | 28 | 8       |
| Shared 3' Terminus                     |    |         |
| .....AGACUUGAGUAGUGAGACG.....          | 19 | 23      |
| .....AAGACUUGAGUAGUGAGACG.....         | 20 | 429     |
| .....AAAGACUUGAGUAGUGAGACG.....        | 21 | 12161   |
| .....GAAAGACUUGAGUAGUGAGACG.....       | 22 | 10338   |
| .....GUGAAAGACUUGAGUAGUGAGACG.....     | 24 | 21      |
| Subsequence                            |    |         |
| .....GAAAGACUUGAGUAGUGAG.....          | 19 | 183     |
| .....GAAAGACUUGAGUAGUGAGA.....         | 20 | 99      |
| .....GAAAGACUUGAGUAGUGAGAC.....        | 21 | 176     |
| .....AAAGACUUGAGUAGUGAG.....           | 18 | 108     |
| .....AAAGACUUGAGUAGUGAGA.....          | 19 | 196     |
| .....AAAGACUUGAGUAGUGAGAC.....         | 20 | 630     |
| .....AAGACUUGAGUAGUGAGA.....           | 18 | 5       |
| .....AAGACUUGAGUAGUGAGAC.....          | 19 | 22      |
| Others                                 |    |         |
| .....GUGAAAGACUUGAGUAGUGAGAC.....      | 23 | 29      |
| .....GAAAGACUUGAGUAGUGAGACGC.....      | 23 | 613     |
| .....GAAAGACUUGAGUAGUGAGACGCU.....     | 24 | 160     |
| .....GAAAGACUUGAGUAGUGAGACGCUU.....    | 25 | 22      |
| .....AAAGACUUGAGUAGUGAGACGC.....       | 22 | 22027   |
| .....AAAGACUUGAGUAGUGAGACGCU.....      | 23 | 76622   |
| .....AAAGACUUGAGUAGUGAGACGCUU.....     | 24 | 9304    |
| .....AAAGACUUGAGUAGUGAGACGCUUA.....    | 25 | 99      |
| .....AAAGACUUGAGUAGUGAGACGCUUAU.....   | 26 | 55      |
| .....AAGACUUGAGUAGUGAGACGC.....        | 21 | 621     |
| .....AAGACUUGAGUAGUGAGACGCU.....       | 22 | 1581    |
| .....AAGACUUGAGUAGUGAGACGCUU.....      | 23 | 355     |
| .....AAGACUUGAGUAGUGAGACGCUUA.....     | 24 | 8       |

|                                      |    |     |
|--------------------------------------|----|-----|
| .....AGACUUGAGUAGUGAGACGCU.....      | 21 | 8   |
| .....AUAGCGUUGUUGUCUGCGGUUCGGCG..... | 26 | 6   |
| .....UAGCGUUGUUGUCUGCGGUUCGGCG.....  | 25 | 5   |
| .....AGCGUUGUUGUCUGCGGUUCGGCG.....   | 24 | 6   |
| .....GCGUUGUUGUCUGCGGUUCGGCG.....    | 23 | 5   |
| .....CGCCUCAUACUAAGUCUUUCC.....      | 21 | 10  |
| .....GCCUCAUACUAAGUCUUUCC.....       | 20 | 81  |
| .....GCCUCAUACUAAGUCUUUCCCG.....     | 22 | 5   |
| .....CCUCAUACUAAGUCUUUC.....         | 18 | 10  |
| .....CCUCAUACUAAGUCUUUCC.....        | 19 | 104 |
| .....CCUCAUACUAAGUCUUUCCCG.....      | 20 | 38  |
| .....CCUCAUACUAAGUCUUUCCCG.....      | 21 | 479 |
| .....CUCAUACUAAGUCUUUCC.....         | 18 | 6   |
| .....CUCAUACUAAGUCUUUCCCG.....       | 20 | 91  |

antisense match

#sja-mir-750  
AAACCAGGTGTGTAGAAGTTGGAAGGCCAGATTTAGCGTACTGTCATATTTAAAATCCTTTTAATAACTTGTTCAAAATGAAAAACATACATTTTATGCAATTCACAGAACAATCATTTCGATTCAGTGAACAAGTTATTTAACTAGTGAATAGTAGGATTTTACGCCAGATCTGTCGTTCCAACTCTATAAATCTGGCCTAACAACT  
Total sRNA: 410991 shared 5' end with miRNA: 99581 shared 3' end with miRNA: 17269  
miRNA

|                                     |    |        |
|-------------------------------------|----|--------|
| .....CCAGAUUCUGUCUCCAAUC.....       | 21 | 281357 |
| Shared 5' Terminus                  |    |        |
| .....CCAGAUUCUGUCUCCAAUC.....       | 18 | 544    |
| .....CCAGAUUCUGUCUCCAAUC.....       | 19 | 5141   |
| .....CCAGAUUCUGUCUCCAAUC.....       | 20 | 83067  |
| .....CCAGAUUCUGUCUCCAAUC.....       | 22 | 5124   |
| .....CCAGAUUCUGUCUCCAAUC.....       | 23 | 5657   |
| .....CCAGAUUCUGUCUCCAAUC.....       | 24 | 42     |
| .....CCAGAUUCUGUCUCCAAUC.....       | 25 | 5      |
| Shared 3' Terminus                  |    |        |
| .....GAUCUGUCGUCCAAUC.....          | 18 | 13     |
| .....AGAUUCUGUCUCCAAUC.....         | 19 | 645    |
| .....CAGAUUCUGUCUCCAAUC.....        | 20 | 16594  |
| .....GCCAGAUUCUGUCUCCAAUC.....      | 22 | 11     |
| Subsequence                         |    |        |
| .....CAGAUUCUGUCUCCAAUC.....        | 18 | 134    |
| .....CAGAUUCUGUCUCCAAUC.....        | 19 | 2375   |
| .....AGAUUCUGUCUCCAAUC.....         | 18 | 57     |
| Others                              |    |        |
| .....AAGUUGGAAGGCCAGAUUU.....       | 19 | 27     |
| .....AAGUUGGAAGGCCAGAUUU.....       | 20 | 85     |
| .....AAGUUGGAAGGCCAGAUUUAG.....     | 21 | 101    |
| .....AAGUUGGAAGGCCAGAUUUAGC.....    | 22 | 250    |
| .....AAGUUGGAAGGCCAGAUUUAGCG.....   | 23 | 7590   |
| .....AAGUUGGAAGGCCAGAUUUAGCGU.....  | 24 | 260    |
| .....AAGUUGGAAGGCCAGAUUUAGCGUA..... | 25 | 10     |
| .....AGUUGGAAGGCCAGAUUUAGCG.....    | 22 | 10     |
| .....CAGAUUCUGUCUCCAAUC.....        | 21 | 483    |
| .....CAGAUUCUGUCUCCAAUC.....        | 22 | 919    |
| .....CAGAUUCUGUCUCCAAUC.....        | 23 | 8      |
| .....AGAUUCUGUCUCCAAUC.....         | 20 | 48     |
| .....AGAUUCUGUCUCCAAUC.....         | 21 | 399    |

antisense match

#sja-mir-7b  
CCAGAGAAACTTGAAGACTTGTGATTTAGTTGTTTAAATGTCGAAATACAAGTAAAACATTTGTCATATCTAAATGAACAACAATCACAATCTCCATGTGAAATCTGGT  
Total sRNA: 5928 shared 5' end with miRNA: 1212 shared 3' end with miRNA: 62  
miRNA

|                                     |    |      |
|-------------------------------------|----|------|
| .....UGGAAGACUUGUGAUUUAGUUGUU.....  | 24 | 4493 |
| Shared 5' Terminus                  |    |      |
| .....UGGAAGACUUGUGAUUUUA.....       | 18 | 12   |
| .....UGGAAGACUUGUGAUUUAG.....       | 19 | 108  |
| .....UGGAAGACUUGUGAUUUAGU.....      | 20 | 110  |
| .....UGGAAGACUUGUGAUUUAGUU.....     | 21 | 40   |
| .....UGGAAGACUUGUGAUUUAGUUG.....    | 22 | 102  |
| .....UGGAAGACUUGUGAUUUAGUUGU.....   | 23 | 824  |
| .....UGGAAGACUUGUGAUUUAGUUGUU.....  | 25 | 15   |
| Shared 3' Terminus                  |    |      |
| .....GAAGACUUGUGAUUUAGUUGUU.....    | 22 | 6    |
| .....GGAAGACUUGUGAUUUAGUUGUU.....   | 23 | 52   |
| Subsequence                         |    |      |
| .....GGAAGACUUGUGAUUUAGUUGUU.....   | 22 | 13   |
| Others                              |    |      |
| .....UAAUGUCGAAAUACAAGUAA.....      | 20 | 9    |
| .....UAAUGUCGAAAUACAAGUAAAACAU..... | 25 | 7    |
| .....UAAUGUCGAAAUACAAGUAAAACAU..... | 26 | 5    |
| .....ACAACAAUCACAAAUCUCCAU.....     | 22 | 5    |
| .....CAACAAUCACAAAUCUCCAU.....      | 20 | 17   |

|                                |    |    |
|--------------------------------|----|----|
| .....CAACAAUCACAAAUCUCAUG..... | 21 | 45 |
| .....CAACAAUCACAAAUCUCAUG..... | 22 | 9  |
| .....AACAAUCACAAAUCUCAUG.....  | 20 | 24 |
| .....AACAAUCACAAAUCUCAUG.....  | 21 | 8  |

antisense match

#sja-mir-8

ATGAGTATGGCATCTTACTAATAGTATTTGATAAAGAATTTTCTAATACTGTTAGGTAAAGATGCCAGCTCACTTC

Total sRNA: 6350 shared 5' end with miRNA: 2014 shared 3' end with miRNA: 28

|                                   |    |      |
|-----------------------------------|----|------|
| .....UAAUACUGUUAGGUAAAAGAUCC..... | 23 | 4289 |
| Shared 5' Terminus                |    |      |
| .....UAAUACUGUUAGGUAAAAG.....     | 18 | 8    |
| .....UAAUACUGUUAGGUAAAAGA.....    | 19 | 29   |
| .....UAAUACUGUUAGGUAAAAGAU.....   | 20 | 180  |
| .....UAAUACUGUUAGGUAAAAGAU.....   | 21 | 138  |
| .....UAAUACUGUUAGGUAAAAGAUCC..... | 22 | 1005 |
| .....UAAUACUGUUAGGUAAAAGAUCC..... | 24 | 654  |
| Shared 3' Terminus                |    |      |
| .....AUACUGUUAGGUAAAAGAUCC.....   | 21 | 7    |
| .....AAUACUGUUAGGUAAAAGAUCC.....  | 22 | 20   |
| Subsequence                       |    |      |
| .....AAUACUGUUAGGUAAAAGAUCC.....  | 21 | 6    |

Others  
antisense match

#sja-mir-new1

AATTATTTCTGATAGAGAGACACTTTTATGACGGAGACGAATATTATCTTCGAATTTTATTTTGAAGTCCATAATGTCATGGAGTTGCTCTCTATATCAGGTTAATTG

Total sRNA: 1527 shared 5' end with miRNA: 73 shared 3' end with miRNA: 4

|                                  |    |      |
|----------------------------------|----|------|
| .....GAGAGAGCACUUUUUGACGGA.....  | 22 | 1192 |
| Shared 5' Terminus               |    |      |
| .....GAGAGAGCACUUUUUGACG.....    | 20 | 22   |
| .....GAGAGAGCACUUUUUGACGG.....   | 21 | 38   |
| .....GAGAGAGCACUUUUUGACGGAG..... | 23 | 8    |
| Shared 3' Terminus               |    |      |
| Subsequence                      |    |      |
| Others                           |    |      |
| .....UAGAGAGAGCACUUUUUGACG.....  | 22 | 30   |
| .....AGAGAGAGCACUUUUUGACG.....   | 21 | 187  |
| .....UGUCAUGGAGUUGCUCUCUAU.....  | 21 | 9    |
| .....UGUCAUGGAGUUGCUCUCUAUA..... | 22 | 12   |

antisense match

#sja-mir-new2

GTATTGGTTTAGCTAAATAGTTAGTTTACTGTCTGTTTTCAAAATCGGGAGGTGGTTACGTATGATGTAGTCTTTAGTTGGATTTAGG

Total sRNA: 21014 shared 5' end with miRNA: 3253 shared 3' end with miRNA: 1329

|                                     |    |       |
|-------------------------------------|----|-------|
| .....AGCUAAAUAGGUUAGUUUGACUGUC..... | 25 | 15436 |
| Shared 5' Terminus                  |    |       |
| .....AGCUAAAUAGGUUAGUUUG.....       | 19 | 28    |
| .....AGCUAAAUAGGUUAGUUUGA.....      | 20 | 70    |
| .....AGCUAAAUAGGUUAGUUUGAC.....     | 21 | 33    |
| .....AGCUAAAUAGGUUAGUUUGACU.....    | 22 | 103   |
| .....AGCUAAAUAGGUUAGUUUGACUG.....   | 23 | 1318  |
| .....AGCUAAAUAGGUUAGUUUGACUGU.....  | 24 | 1359  |
| .....AGCUAAAUAGGUUAGUUUGACUGUC..... | 26 | 339   |
| Shared 3' Terminus                  |    |       |
| .....UAGGUUAGUUUGACUGUC.....        | 18 | 342   |
| .....AUAGGUUAGUUUGACUGUC.....       | 19 | 66    |
| .....AAUAGGUUAGUUUGACUGUC.....      | 20 | 31    |
| .....AAAUAGGUUAGUUUGACUGUC.....     | 21 | 379   |
| .....UAAAUAGGUUAGUUUGACUGUC.....    | 22 | 14    |
| .....CUAAAUAGGUUAGUUUGACUGUC.....   | 23 | 6     |
| .....GCUAAAUAGGUUAGUUUGACUGUC.....  | 24 | 491   |

Subsequence

|                                      |    |     |
|--------------------------------------|----|-----|
| .....GCUAAAUAGGUUAGUUUGACUG.....     | 22 | 29  |
| .....GCUAAAUAGGUUAGUUUGACUGU.....    | 23 | 36  |
| .....AAAUAGGUUAGUUUGACU.....         | 18 | 6   |
| .....AAAUAGGUUAGUUUGACUG.....        | 19 | 15  |
| .....AAAUAGGUUAGUUUGACUGU.....       | 20 | 7   |
| .....AUAGGUUAGUUUGACUGU.....         | 18 | 5   |
| Others                               |    |     |
| .....AAAUAGGUUAGUUUGACUGUCU.....     | 22 | 7   |
| .....AAAUAGGUUAGUUUGACUGUCUGUUU..... | 26 | 5   |
| .....AUAGGUUAGUUUGACUGUCU.....       | 20 | 5   |
| .....AUAGGUUAGUUUGACUGUCUGUU.....    | 23 | 7   |
| .....AUAGGUUAGUUUGACUGUCUGUUU.....   | 24 | 7   |
| .....CGGGAGGUGGUUACGUAUG.....        | 19 | 11  |
| .....CGGGAGGUGGUUACGUAUGAUGUA.....   | 24 | 14  |
| .....GGGAGGUGGUUACGUAUGAU.....       | 20 | 13  |
| .....AGGUGGUUACGUAUGAUGUA.....       | 20 | 9   |
| .....GGUACGUAUGAUGUAGU.....          | 18 | 131 |
| .....GGUACGUAUGAUGUAGUC.....         | 19 | 53  |
| .....GGUACGUAUGAUGUAGUCU.....        | 20 | 285 |
| .....GGUACGUAUGAUGUAGUCUU.....       | 21 | 111 |
| .....GGUACGUAUGAUGUAGUCUUU.....      | 22 | 43  |
| .....GGUACGUAUGAUGUAGUCUUUA.....     | 23 | 34  |
| .....GGUACGUAUGAUGUAGUCUUUAG.....    | 24 | 7   |
| .....GGUACGUAUGAUGUAGUCUUUAGUUG..... | 27 | 16  |
| .....AUGAUGUAGUCUUUAGUU.....         | 18 | 5   |
| antisense match                      |    |     |
