# Supplementary material for: MicroRNAs Are Involved in the Regulation of Ovary Development in the Pathogenic Blood Fluke Schistosoma japonicum
Source: PubMed Central journal article supplement (PMC4752461; doi:10.1371/journal.ppat.1005423), 2016-02-12
Supplement: ppat.1005423.s014.pdf [file ppat.1005423.s014.pdf]

**S1 Table. Schistosome small RNA sequences**

|                                    | 16F                    | 16M                    | 22F                    | 22M                    | 28F                   | 28M                    | F                      | M                      |
|------------------------------------|------------------------|------------------------|------------------------|------------------------|-----------------------|------------------------|------------------------|------------------------|
| Total reads                        | 14,338,843             | 16,011,457             | 14,639,621             | 13,394,192             | 14,884,947            | 14,280,870             | 14,945,055             | 14,363,457             |
| High quality                       | 14,277,073<br>(100%)   | 15,944,619<br>(100%)   | 14,579,258<br>(100%)   | 13,337,718<br>(100%)   | 14,820,290<br>(100%)  | 14,221,100<br>(100%)   | 12,531,556<br>(100%)   | 12,194,511<br>(100%)   |
| 3' adapter null                    | 2,838<br>(0.02%)       | 2,710<br>(0.02%)       | 3,287<br>(0.02%)       | 3,239<br>(0.02%)       | 3,762<br>(0.03%)      | 2,674<br>(0.02%)       | 2,368<br>(0.02%)       | 2,133<br>(0.02%)       |
| Insert null                        | 1,044<br>(0.01%)       | 1,003<br>(0.01%)       | 1,157<br>(0.01%)       | 1,012<br>(0.01%)       | 2,144<br>(0.01%)      | 1,570<br>(0.01%)       | 16,583<br>(0.13%)      | 13,445<br>(0.11%)      |
| 5'adapter<br>contaminants          | 26,684<br>(0.19%)      | 23,385<br>(0.15%)      | 33,290<br>(0.23%)      | 29,933<br>(0.22%)      | 39,343<br>(0.27%)     | 36,595<br>(0.26%)      | 173,180<br>(1.38%)     | 99,028<br>(0.81%)      |
| Smaller than 18nt                  | 93,928<br>(0.66%)      | 192,886<br>(1.21%)     | 158,346<br>(1.09%)     | 58,546<br>(0.44%)      | 725,630<br>(4.9%)     | 301,643<br>(2.12%)     | 215,632<br>(1.72%)     | 89,823<br>(0.74%)      |
| PolyA                              | 283<br>(0.00%)         | 671<br>(0.00)          | 673<br>(0.00%)         | 856<br>(0.01%)         | 357<br>(0.00%)        | 600<br>(0.00%)         | 484<br>(0.00%)         | 535<br>(0.00%)         |
| Clean reads                        | 14,152,296<br>(99.13%) | 15,723,964<br>(98.62%) | 14,382,505<br>(98.65%) | 13,244,132<br>(99.30%) | 14,049,054<br>(94.8%) | 13,878,018<br>(97.59%) | 12,123,309<br>(96.74%) | 11,989,547<br>(98.32%) |
| Sequences matched<br>to the genome | 7,964,991<br>(56.28%)  | 8,947,298<br>(56.90%)  | 6,693,114<br>(46.54%)  | 6,541,610<br>(46.54%)  | 8,895,031<br>(63.31%) | 7,043,390<br>(50.75%)  | 6,715,016<br>(55.39%)  | 6,303,431<br>(52.57%)  |
