# Supplementary material for: MicroRNAs Are Involved in the Regulation of Ovary Development in the Pathogenic Blood Fluke Schistosoma japonicum
Source: PubMed Central journal article supplement (PMC4752461; doi:10.1371/journal.ppat.1005423), 2016-02-12
Supplement: ppat.1005423.s016.pdf [file ppat.1005423.s016.pdf]

**S3 Table. Oligonucleotides used as probes for Northern blots**

| Names         | Sequences                        |
|---------------|----------------------------------|
| sjal-let-7b   | 5`/DigN/AGTCATATGAATCACTACCTCT3` |
| sjal-let-7s*  | 5`/DigN/AGTCGTACATCTAACTACCTC3`  |
| sjal-miR-750  | 5`/DigN/AGTTGGAAGCGACAGATCTGG3`  |
| sjal-miR-1175 | 5`/DigN/CAGTTGAAGTAATTGAATCTCA3` |
| sjal-miR-1989 | 5`/DigN/TCGAAGACATGAACACAGCTGA3` |
| sjal-miR-new1 | 5`/DigN/TCCGTCATAAAAGTGCTCTCTC3` |
| sjal-miR-new2 | 5`/DigN/GACAGTCAAACCTATTTAGCT3`  |
| sjal-lin-4    | 5`/DigN/ACAACCTCTAAGGTCTCAGGGA3` |
| sjal-miR-1b   | 5`/DigN/GCACATACTTCACAACATTCCA3` |
| sjal-miR-277b | 5`/DigN/TCTAGGGTAGATGATGCATTTT3` |
