# Supplementary material for: MicroRNAs Are Involved in the Regulation of Ovary Development in the Pathogenic Blood Fluke Schistosoma japonicum
Source: PubMed Central journal article supplement (PMC4752461; doi:10.1371/journal.ppat.1005423), 2016-02-12
Supplement: ppat.1005423.s017.pdf [file ppat.1005423.s017.pdf]

**S4 Table. Primers for stem-loop RT-PCR analyses**

| Names       | Sequences                                                |                    |
|-------------|----------------------------------------------------------|--------------------|
| sj-miR-277b | 5`GTCGTATCCAGTGCAGGGTCCGAGGTATTTCGCACTGGATACGACTCTAGG3`  | Reverse transcript |
| sj-miR-1175 | 5`GTCGTATCCAGTGCAGGGTCCGAGGTATTTCGCACTGGATACGACCAGTTG3`  | Reverse transcript |
| sj-miR-1989 | 5`GTCGTATCCAGTGCAGGGTCCGAGGTATTTCGCACTGGATACGACTCGAAG3`  | Reverse transcript |
| sj-lin-4    | 5`GTCGTATCCAGTGCAGGGTCCGAGGTATTTCGCACTGGATACGACACAAC3`   | Reverse transcript |
| sj-miR-new1 | 5`GTCGTATCCAGTGCAGGGTCCGAGGTATTTCGCACTGGATACGACTCCGTC3`  | Reverse transcript |
| sj-miR-new2 | 5`GTCGTATCCAGTGCAGGGTCCGAGGTATTTCGCACTGGATACGACGACAGT3`  | Reverse transcript |
| sj-let-7    | 5`GTCGTATCCAGTGCAGGGTCCGAGGTATTTCGCACTGGATACGACACCACA3`  | Reverse transcript |
| sj-let-7b   | 5`GTCGTATCCAGTGCAGGGTCCGAGGTATTTCGCACTGGATACGACAGTCAT3`  | Reverse transcript |
| sj-let-7s*  | 5`GTCGTATCCAGTGCAGGGTCCGAGGTATTTCGCACTGGATACGACAGTCGT3`  | Reverse transcript |
| sj-mir-1    | 5`GTCGTATCCAGTGCAGGGTCCGAGGTATTTCGCACTGGATACGACGACCAT3`  | Reverse transcript |
| sj-mir-2a   | 5`GTCGTATCCAGTGCAGGGTCCGAGGTATTTCGCACTGGATACGACCGTTCA3`  | Reverse transcript |
| sj-mir-7b   | 5`GTCGTATCCAGTGCAGGGTCCGAGGTATTTCGCACTGGATACGACAACAAC3`  | Reverse transcript |
| sj-mir-10   | 5`GTCGTATCCAGTGCAGGGTCCGAGGTATTTCGCACTGGATACGACCCAAAC3`  | Reverse transcript |
| sj-mir-36   | 5`GTCGTATCCAGTGCAGGGTCCGAGGTATTTCGCACTGGATACGACGCGAAT3`  | Reverse transcript |
| sj-mir-71a  | 5`GTCGTATCCAGTGCAGGGTCCGAGGTATTTCGCACTGGATACGACCATCTC3`  | Reverse transcript |
| sj-mir-71b  | 5`GTCGTATCCAGTGCAGGGTCCGAGGTATTTCGCACTGGATACGACCGTCTC3`  | Reverse transcript |
| sj-mir-125a | 5`GTCGTATCCAGTGCAGGGTCCGAGGTATTTCGCACTGGATACGACGACAATC3` | Reverse transcript |
| sj-mir-125b | 5`GTCGTATCCAGTGCAGGGTCCGAGGTATTTCGCACTGGATACGACAGCAAT3`  | Reverse transcript |
| sj-mir-190  | 5`GTCGTATCCAGTGCAGGGTCCGAGGTATTTCGCACTGGATACGACACCAAG3`  | Reverse transcript |
| sj-mir-307  | 5`GTCGTATCCAGTGCAGGGTCCGAGGTATTTCGCACTGGATACGACCATCAA3`  | Reverse transcript |
| sj-mir-750  | 5`GTCGTATCCAGTGCAGGGTCCGAGGTATTTCGCACTGGATACGACAGTTGG3`  | Reverse transcript |

|                  |                                                         |                    |
|------------------|---------------------------------------------------------|--------------------|
|                  |                                                         | transcript         |
| sj-mir-1b        | 5`GTCGTATCCAGTGCAGGGTCCGAGGTATTTCGCACTGGATACGACGCACAT3` | Reverse transcript |
| sj-mir-3505      | 5`GTCGTATCCAGTGCAGGGTCCGAGGTATTTCGCACTGGATACGACTTTCTA3` | Reverse transcript |
| sj-miR-277b_F    | 5`ATCGTACGTGGGAAAATGCAT3`                               | PCR                |
| sj-miR-1175_F    | 5`ATCGTACGTGGGTGAGATTCA3`                               | PCR                |
| sj-miR-1989_F    | 5`ATCGTACGTGGGTGAGCTGTG3`                               | PCR                |
| sj-lin-4_F       | 5`ATCGTACGTGGGTCCCTGAGA3`                               | PCR                |
| sj-miR-new1_F    | 5`ATCGTACGTGGGGAGAGAGCA3`                               | PCR                |
| sj-miR-new2_F    | 5`ATCGTACGTGGGAGCTAAAT3`                                | PCR                |
| sj-let-7_F       | 5`ATCGTACGTGGGGGAGGTAGT3`                               | PCR                |
| sj-let-7b_F      | 5`ATCGTACGTGGGAGAGGTAG3`                                | PCR                |
| sj-let-7s*_F     | 5`ATCGTACGTGGGGAGGTAGTT3`                               | PCR                |
| sj-mir-1_F       | 5`ATCGTACGTGGGTGGAATGTG3`                               | PCR                |
| sj-mir-2a_F      | 5`ATCGTACGTGGGTGACAGCCA3`                               | PCR                |
| sj-mir-7b_F      | 5`ATCGTACGTGGGTGGAAGACT3`                               | PCR                |
| sj-mir-10_F      | 5`ATCGTACGTGGGAACCCTGTA3`                               | PCR                |
| sj-mir-36_F      | 5`ATCGTACGTGGGCCACCGGGT3`                               | PCR                |
| sj-mir-71a_F     | 5`ATCGTACGTGGGTGAAAGACG3`                               | PCR                |
| sj-mir-71b_F     | 5`ATCGTACGTGGGTGAAAGACT3`                               | PCR                |
| sj-mir-125a_F    | 5`ATCGTACGTGGGTCCCTGAGACCCTTT3`                         | PCR                |
| sj-mir-125b_F    | 5`ATCGTACGTGGGTCCCTGAGACTGA3`                           | PCR                |
| sj-mir-190_F     | 5`ATCGTACGTGGGTGATATGTA3`                               | PCR                |
| sj-mir-307_F     | 5`ATCGTACGTGGGCCTCATAAA3`                               | PCR                |
| sj-mir-750_F     | 5`ATCGTACGTGGGCCAGATCTG3`                               | PCR                |
| sj-mir-1b_F      | 5`ATCGTACGTGGGTGGAATGTT3`                               | PCR                |
| sj-mir-3505_F    | 5`ATCGTACGTGGGTGACTGTC3`                                | PCR                |
| Universal primer | 5`GCAGGGTCCGAGGTATTC3`                                  | PCR                |
