# Supplementary material for: MicroRNAs Are Involved in the Regulation of Ovary Development in the Pathogenic Blood Fluke Schistosoma japonicum
Source: PubMed Central journal article supplement (PMC4752461; doi:10.1371/journal.ppat.1005423), 2016-02-12
Supplement: ppat.1005423.s018.pdf [file ppat.1005423.s018.pdf]

**S5 Table. Primers used for miRNA target identification**

| Primer names          | Sequences                     |
|-----------------------|-------------------------------|
| let-7                 | 5`CCACACAACGAACTACCTC3`       |
| let-7b                | 5`GTCATATGAATCACTACCTC3`      |
| let-7s                | 5`AGTCGTACATCTAACTACCT3`      |
| miR-1                 | 5`ACCATACTTCGCCACATTCC3`      |
| miR-1b                | 5`CACATACTTCACAACATTCC3`      |
| miR-2d                | 5`GTCACCTAAGCAGGACTGTGAT3`    |
| miR-2b                | 5`GTGTCCCAAGCAGGGCTGTGAT3`    |
| miR-2a                | 5`GTTTCATCAATACTGGCTGTG3`     |
| miR-7                 | 5`ACAACATATCACCAGTCTTCC3`     |
| miR-7b                | 5`ACAACATAAATCACAAGTCTTCC3`   |
| miR-8                 | 5`GCATCTTTACCTAACAGTATT3`     |
| miR-10                | 5`CAAACCTCGGGTCTACAGGGT3`     |
| miR-31                | 5`CAGCTTTCGCCGTAATCTTGCC3`    |
| miR-36                | 5`CGAATGAATGTCTACCCGGTG3`     |
| miR-2162              | 5`GAGTGAAACGTTGCATAAT3`       |
| miR-61                | 5`AAGTGAGTGCACCTTCTAGTC3`     |
| miR-71a               | 5`ATCTCACTACCATCGTCTTTC3`     |
| miR-71b               | 5`GTCTCACTACTCAAGTCTTTC3`     |
| miR-124               | 5`GACATTCACCGCGTGCCTT3`       |
| miR-125a              | 5`CAATCAAAGGGTCTCAGGG3`       |
| miR-125b              | 5`GCAATTATCAGTCTCAGGG3`       |
| miR-190               | 5`CCAAGTAACCCATACATATC3`      |
| miR-219               | 5`AGAAATGCGAATGGACAATC3`      |
| miR-3479              | 5`AAGGCGAAGGTAAGTGCAAT3`      |
| miR-277               | 5`ACGGGCCAGAAAATGCATTT3`      |
| miR-277b              | 5`CTAGGGTAGATGATGCATTT3`      |
| miR-750               | 5`GAGTTGGAAGCGACAGATCTG3`     |
| miR-1175              | 5`AGTTGAAGTAATTGAATCTC3`      |
| miR-2c                | 5`ACATCACAGTCGAACAAGGG3`      |
| miR-2e                | 5`TAACTCAGTCTAAGTTGGT3`       |
| Universal down primer | 5`GCTGTCAACGATACGCTACGTAACG3` |
| Bantam                | 5`CCAGCTTTAATCGCGATCTC3`      |
| miR-1989              | 5`CGAAGACATGAACACAGCTG3`      |
| miR-new1              | 5`CCGTCATAAAAGTGCTCTCT3`      |
| lin-4                 | 5`CAACTCTAAGGTCTCAGGG3`       |
