# Supplementary material for: MicroRNAs Are Involved in the Regulation of Ovary Development in the Pathogenic Blood Fluke Schistosoma japonicum
Source: PubMed Central journal article supplement (PMC4752461; doi:10.1371/journal.ppat.1005423), 2016-02-12
Supplement: ppat.1005423.s019.pdf [file ppat.1005423.s019.pdf]

**S6 Table. List of the potential target genes for *S. japonicum* miRNAs**

| miRNAs   | Target gene IDs | Name of target genes                      | MiRNA:mRNA duplex*                                                                                  | Mfe (kcal/mol) |
|----------|-----------------|-------------------------------------------|-----------------------------------------------------------------------------------------------------|----------------|
| miR-new1 | AY812714.1      | Outer dense fiber of sperm tails 2        | target 5' A UUUCUUGU A 3'<br>UUGUC AGUGCUCUCU<br>GGCAG UCACGAGAGA<br>miRNA 3' A UAUUU G 5'          | -22.6          |
|          | AY811515.1      | T-complex                                 | target 5' G A UUA G 3'<br>CUGUC AUGAA GCUCU<br>GGCAG UAUUU CGAGA<br>miRNA 3' A UCA GAG 5'           | -21.1          |
| Let-7    | FN315235.1      | Hypothetical protein                      | target 5' UG U UUGUU G 3'<br>U A CAAC ACUACCUC<br>G U GUUG UGAUGGAG<br>miRNA 3' UG UG CU G 5'       | -21.1          |
|          | FN327005.1      | Hypothetical protein                      | target 5' A UG U A G 3'<br>U A CAAC GAACUACCUC<br>G U GUUG CUUGAUGGAG<br>miRNA 3' UG UG G 5'        | -26.4          |
|          | AY814216.1      | Hypothetical protein                      | target 5' A UG U A G 3'<br>U A CAAC GAACUACCUC<br>G U GUUG CUUGAUGGAG<br>miRNA 3' UG UG G 5'        | -26.4          |
| Let-7b   | AY810070.1      | Lim domain                                | target 5' U G 3'<br>GUAUGAAU CAUUACCUC<br>UAUACUUA GUGAUGGAG<br>miRNA 3' UCAG A 5'                  | -25.4          |
|          | AY814216.1      | Hypothetical protein                      | target 5' A GAUCAACAGA G 3'<br>UAUGUGAAUU ACUACCUC<br>GUAUACUUAG UGAUGGAG<br>miRNA 3' UCA A 5'      | -26.0          |
| Let-7s   | FN317371.1      | Hypothetical protein                      | target 5' G UUUUUCUUC U G 3'<br>UGUA CAUCUA CUACCU<br>GCAU GUAGAU GAUGGA<br>miRNA 3' UCA U G 5'     | -21.0          |
| miR-2a   | AY811143.1      | CDS of Lipid synthesized                  | target 5' A AG AAU C 3'<br>GU AU CUGGCUGUG<br>CA UA GACCGACAC<br>miRNA 3' G AG GUUUAU U 5'          | -22.8          |
|          | AY336493.1      | RNA polymerase B transcription factor 3   | target 5' U CCUU U A C 3'<br>CGUUC UUA UACUG CUGUG<br>GCAAAG AGU AUGAC GACAC<br>miRNA 3' U U C U 5' | -22.5          |
|          | AY223360.1      | Hypothetical protein                      | target 5' A UUU AU C 3'<br>UGUUCGUCA CUG CUGUGG<br>GCAAAGUAGU GAC GACACU<br>miRNA 3' UAU C 5'       | -25.4          |
| miR-1    | FN318139.1      | Putative signal peptide peptidase-like 2A | target 5' A 3'<br>CAUA CCACAUUCC<br>GUAU GGUGUAAGG<br>miRNA 3' CUG GAAGC U 5'                       | -19.7          |
|          | AY915410.1      | PKC                                       | target 5' C C C 3'<br>ACCA UCGCCAC UCC<br>UGGU AGCGGUG AGG<br>miRNA 3' C AUGA UA U 5'               | -23.4          |
| Lin-4    | FN324931.1      | Ploy A binding protein                    | target 5' A C A C U 3'<br>AC ACUU AA GUCUCA GG<br>UG UGAG UU CAGAGU CC<br>miRNA 3' U A C C U 5'     | -19.0          |
