# Supplementary material for: MicroRNAs Are Involved in the Regulation of Ovary Development in the Pathogenic Blood Fluke Schistosoma japonicum
Source: PubMed Central journal article supplement (PMC4752461; doi:10.1371/journal.ppat.1005423), 2016-02-12
Supplement: ppat.1005423.s020.pdf [file ppat.1005423.s020.pdf]

**S7 Table. Primer pairs used to generate miRNA target regions for pGLU-CMV luciferase vector constructs**

| GenBank IDs | miRNAs   | Sequences                              | Enzyme sites |
|-------------|----------|----------------------------------------|--------------|
| FN321618.1  | miR-2    | ATAAGAATGCGGCCGCTTGTTGAAGAAAGGCAAAC    | <i>Not I</i> |
|             |          | CCGCTCGAGCAATCGTGGAAGTGTGAC            | <i>Xho I</i> |
| FN314191.1  | let-7a   | ATAAGAATGCGGCCGCCAGTGGATACTACTTCGGAT   | <i>Not I</i> |
|             |          | CCGCTCGAGTTAAACAGCATAGATTTGG           | <i>Xho I</i> |
| DQ643829    | miR-8    | GCCTCGAGAAGAAAGATTTCATGAAG             | <i>Xho I</i> |
|             |          | CCTCTAGAATATCTTGGATCATGATGAC           | <i>Xba I</i> |
| FN313640    | miR-8    | GCCTCGAGCAATCTCTCAAGCAACGAAC           | <i>Xho I</i> |
|             |          | CCTCTAGAACACCGGAATATGTAGTAAA           | <i>Xba I</i> |
| EU370927    | miR-31   | CCGGCGGCCGCCAGCATTAGAGAGACCTGAG        | <i>Not I</i> |
|             |          | CGCTCGAGAACAAGGGAACAGAACCAGG           | <i>Xho I</i> |
| FN317226    | miR-1989 | GCCTCGAGCACTATTTAATCGCACCAAC           | <i>Xho I</i> |
|             |          | CCTCTAGATAAGTGTTATTTGTATCAGG           | <i>Xba I</i> |
| FJ753578.1  | miR-3479 | GCCTCGAGCAGTTGTGTTGTACTTACAG           | <i>Xho I</i> |
|             |          | CCTCTAGACATGCTTCACATTGTGCGTGCT         | <i>Xba I</i> |
| FN323394.1  | Bantam   | GCCTCGAGCACGCAGCGACCGTAGAGAA           | <i>Xho I</i> |
|             |          | CCTCTAGAAAAAACCGGAACGAGATCGTGA         | <i>Xba I</i> |
| AY815194.1  | miR-277  | ATAAGAATGCGGCCGCAGAAAAACAATTTCTTTACTTC | <i>Not I</i> |
|             |          | CCGCTCGAGAGATGAAGATTACATATAT           | <i>Xho I</i> |
