# Supplementary material for: MicroRNAs Are Involved in the Regulation of Ovary Development in the Pathogenic Blood Fluke Schistosoma japonicum
Source: PubMed Central journal article supplement (PMC4752461; doi:10.1371/journal.ppat.1005423), 2016-02-12
Supplement: ppat.1005423.s021.pdf [file ppat.1005423.s021.pdf]

**S8 Table. miRNA mimics used for cell transfection and worm electroporation**

| Names              | Sequences               | Modifications |
|--------------------|-------------------------|---------------|
| let-7a             | GGAGGUAGUUCGUUGUGUGGU   | 2`-Ome        |
| Antisense-let-7a   | ACCACACAACGAACUACCUCC   | 2`-Ome        |
| Scrambled miRNA    | CCUCCAUCAACGUUGUGUGGU   | 2`-Ome        |
| miR-2              | UCACAGCCAGUAUUGAUGAACG  | 2`-Ome        |
| Antisense-miR-2    | CGUUCAUCAAUACUGGCUGUGA  | 2`-Ome        |
| Scrambled miRNA    | GGUGCAGAGCUAUUGAUGAACG  | 2`-Ome        |
| miR-8 mimics       | UAAUACUGUUAGGUAAGAUGCC  | 2`-Ome,PS     |
| Antisense-miR-8    | GGCAUCUUUACCUAACAGUAUUA | 2`-Ome,PS     |
| Scrambled miR-8    | GUAUUGCAAGACAUAAGAUGCC  | 2`-Ome,PS     |
| miR-31 mimics      | UGGCAAGAUUACGGCGAAGCU   | 2`-Ome,PS     |
| Antisense-miR-31   | AGCUUCGCCGUAUUCUUGCCA   | 2`-Ome,PS     |
| Scrambled miR-31   | GCGCAUACGGUCGGCGAAGCU   | 2`-Ome,PS     |
| miR-3479 mimics    | UAUUGCACUUACCUUCGCCUUG  | 2`-Ome,PS     |
| Antisense-miR-3479 | CAAGGCGAAGGUAAGUGCAAUA  | 2`-Ome,PS     |
| Scrambled miR-3479 | GUAACGUGAAACCAUCGCGUUG  | 2`-Ome,PS     |
| Bantam mimics      | UGAGAUCGCGAUUAAAGCU     | 2`-Ome,PS     |
| Antisense-bantam   | AGCUUUAUUCGCGAUCUCA     | 2`-Ome,PS     |
| Scrambled bantam   | GCUCUGGCGGAUUAAGCU      | 2`-Ome,PS     |
| miR-277 mimics     | UAAAUGCAUUUUCUGGCCCGU   | 2`-Ome,PS     |
| Antisense-miR-277  | ACGGGCCAGAAAUGCAUUUA    | 2`-Ome,PS     |
| Scrambled miR-277  | UCUGCCGACCAUCUGGCCCGU   | 2`-Ome,PS     |
