# Supplementary material for: MicroRNAs Are Involved in the Regulation of Ovary Development in the Pathogenic Blood Fluke Schistosoma japonicum
Source: PubMed Central journal article supplement (PMC4752461; doi:10.1371/journal.ppat.1005423), 2016-02-12
Supplement: ppat.1005423.s022.pdf [file ppat.1005423.s022.pdf]

**S9 Table. Primers used for miRNA suppression studies on *in vivo* cultured schistosomes**

| miRNAs | GenBank IDs | Primer sequences          |
|--------|-------------|---------------------------|
| Bantam | AY223092.1  | 5` ACGCGACGAACCCCATCGTG3` |
|        |             | 5` ACCGCGATCTGGTGGGGGAT3` |
| Bantam | FN323394.1  | 5` ACGCGACGAACCCCATCGTG3` |
|        |             | 5` GACCGCGATCTGGTGGGGGA3` |
| Bantam | AY815078.1  | 5` TTGGCGGTGAGGTGTATG3`   |
|        |             | 5` TGAACAACCTGGTGAAT3`    |
| miR-31 | FN319623.1  | 5` CGCGCAGCGACTTTGCTTGG3` |
|        |             | 5` CGCGAAGGGCGGAAGGAAGG3` |
