# Supplementary material for: MicroRNAs Are Involved in the Regulation of Ovary Development in the Pathogenic Blood Fluke Schistosoma japonicum
Source: PubMed Central journal article supplement (PMC4752461; doi:10.1371/journal.ppat.1005423), 2016-02-12
Supplement: ppat.1005423.s023.pdf [file ppat.1005423.s023.pdf]

**S10 Table. LNAs used for miRNA in situ hybridization and primers used for probe preparation**

|                       |                                                                                                                        | size  |
|-----------------------|------------------------------------------------------------------------------------------------------------------------|-------|
| miR-31                | /5DigN/AGCTTCGCCGTAATCTTGCCA/3Dig_N/                                                                                   |       |
| Bantam                | /5DigN/ACCAGCTTTAATCGCGATCTCA/3Dig_N/                                                                                  |       |
| Scrambled Sj miRNA    | /5DigN/GTGTAACACGTCTATACGCCCA/3Dig_N/                                                                                  |       |
| Frizz7<br>(EU370927)  | Forward primer: 5'TGTTGGCGAAGCATTCAACG3`<br>Reverse primer: 5`<br>ATCGAAATTAATACGACTCACTATAGGGCCGACTGAGAAGGTGAGCGAA3`  | 661nt |
| Smad1<br>(AY815078.1) | Forward primer: 5`TGGGGCATGCAACTCAAGAT3`<br>Reverse primer: 5` ATCGAAATTAATACGACTCACTATAGGGC<br>CTGAGAGACTGTGGTGCTGG3` | 336nt |
