# Supplementary material for: MicroRNAs Are Involved in the Regulation of Ovary Development in the Pathogenic Blood Fluke Schistosoma japonicum
Source: PubMed Central journal article supplement (PMC4752461; doi:10.1371/journal.ppat.1005423), 2016-02-12
Supplement: ppat.1005423.s024.pdf [file ppat.1005423.s024.pdf]

**S11 Table. Putative miRNAs identified in the sequencing that are not supported by our additional miRNA criteria**

| <b>miRNA names</b> | <b>Reasons</b>                                | <b>Sequences</b>        | <b>Read #</b> |
|--------------------|-----------------------------------------------|-------------------------|---------------|
| sj-mir-3489        | across & both strands                         | GCCACAACAGUUCGAGGACG    | 3,909         |
| sj-mir-3490        | across & both strands                         | UCCUUUGGGUUGUGGGGAUA    | 1,041         |
| sj-mir-3491        | across & both strands                         | UGAGCGAUUACUGGAGUUCA    | 936           |
| sj-mir-3492        | across & both strands                         | AUCCGUGCUGAGAUUUCGUCU   | 2,455         |
| sj-mir-3493        | across & both strands                         | UGGAUUUCAGUAGCAUCCACU   | 1,826         |
| sj-mir-3494        | across & both strands                         | GACAGAAGACUGCCGCUCAU    | 667           |
| sj-mir-3495        | across & both strands                         | UCAAAAUCGUUGGCAAUGGCU   | 1,397         |
| sj-mir-3496        | across & both strands                         | CGGCGUCUGGACGUUUGGUUUU  | 811           |
| sj-mir-3497        | across & both strands                         | CGCAAGGGACUACCAUGGCA    | 389           |
| sj-mir-3498        | across & both strands                         | UAGACGGUUUGAAACAUGGA    | 957           |
| sj-mir-3499        | across & both strands                         | UCUGAAUCCGUGCUGAGAUUUU  | 729           |
| sj-mir-3500        | across & both strands                         | AGGAGAUCGGUGGUAGAUUGU   | 612           |
| sj-mir-3501        | across & both strands                         | AACCUUGUAGUUUCGUUGUG    | 462           |
| sj-mir-3502        | across & both strands                         | GUGACGAUCGUACAUGUCUU    | 1,378         |
| sj-mir-310         | across & both strands & low reads #           | UCAAGAUGACGCGACUCUCG    | 726           |
| sj-mir-3480        | across & both strands & low reads #           | AAACAGACAUACCAAUGCAG    | 58            |
| sj-mir-3481        | across & both strands & low reads #           | GGUGAUCUUUGUAUGGACAA    | 101           |
| sj-mir-3483        | across & both strands & low reads #           | UAUGCCUGACCACCGUCUACU   | 25            |
| sj-mir-3484        | across & both strands & low reads #           | UUAGGUUUCGUUGUUUGUAUUU  | 6             |
| sj-mir-3485        | across & both strands & low reads #           | ACUUGUGGUGUAGGCGAGAC    | 13            |
| sj-mir-3486        | across & both strands & low reads #           | UCUGUGUUGAAUUUGAGGAU    | 122           |
| sj-mir-3504        | across & both strands & low reads #           | GUGUGGUUGUCAGAAGGGGC    | 96            |
| sj-mir-3506        | across & both strands & low reads #           | ACGAGGUUAGACGACGAGUG    | 65            |
| sj-mir-3507        | across & both strands & low reads #           | AGAGAAUAGGGCAUGGGUACU   | 555           |
| sj-mir-3482        | very low reads #                              | GAUGCGCACUGCCGAGGAUUUC  | 47            |
| sj-mir-133         | conserved but not hairpin & low reads #       | UUGGUCCCUAUCAACCAGCUGU  | 151           |
| sj-mir-3503        | no bulge hairpin & both strands & low reads # | AGCGGAAUCCAGGACACGCGUUU | 172           |
